# Supplementary material
Source: Springer Nature journal article supplement (https://www.springermedizin.de/resource/supplementary/13002_2012_305_MOESM1_ESM.pdf/9627574)
Supplement: MOESM1 [file 9627574]

**Appendix 1. List of medicinal plants used in the southern region of the State of Nuevo León, México. Number after plant author B.S. (Brianda Soto, number of collection), E.E (Eduardo Estrada, number of collection)**

---

| Scientific name                                                    | Common name    | Uses                    | Part used                                                         | Method of use                            |
|--------------------------------------------------------------------|----------------|-------------------------|-------------------------------------------------------------------|------------------------------------------|
| ADIANTACEAE                                                        |                |                         |                                                                   |                                          |
| <i>Adiantum capillus-veneris</i><br>L., B.S. 321                   | Culantrillo    | Hemorrhages             | Leaves and stems                                                  | Infusion                                 |
| AGAVACEAE                                                          |                |                         |                                                                   |                                          |
| <i>Agave americana</i> L. var.<br><i>marginata</i> Trel., B.S. 416 | Maguey         | Beverage                | Mead                                                              | Beverage                                 |
|                                                                    |                | Arthritis               | (mead, aguamiel)<br>Leaves cut into pieces<br>embedded in alcohol | Poultice                                 |
| <i>Agave celsii</i> Hook., B.S. 382                                | Maguey de peña | High fever and headache | Leaves                                                            | Roasted, stick over the temples          |
| <i>Agave lecheguilla</i> Torr., B.S. 383                           | Lechuguilla    | Baldness                | Root                                                              | Macerated, boiled and mixed with shampoo |
|                                                                    |                | Dandruff                | Root                                                              | Macerated,                               |

|                                            |        |                    |                                             |                                                                               |
|--------------------------------------------|--------|--------------------|---------------------------------------------|-------------------------------------------------------------------------------|
|                                            |        |                    |                                             | boiled and<br>mixed with<br>shampoo                                           |
|                                            |        | Kidney<br>stones   | Root                                        | Boiled,<br>ingestion of<br>infusion                                           |
|                                            |        | Prostate<br>cancer | Root                                        | Boiled,<br>ingestion of<br>infusion                                           |
| <i>Agave macroculmis</i> Tod.,<br>B.S. 381 | Maguey | Wounds             | Mead<br>(aguamiel)<br>mixed with<br>alcohol | Applied over the<br>wound                                                     |
|                                            |        | Beverage           | Mead                                        | Boiled, ingest                                                                |
|                                            |        | Kidney<br>stones   | Mead                                        | Boiled,<br>ingestion of<br>infusion, drink<br>as the first meal<br>of the day |
|                                            |        | Diabetes           | Sap                                         | Spread on bread,<br>ingest                                                    |
|                                            |        | Food<br>(quite)    | Scape<br>(inflorescence)                    | Baked in a pit<br>oven                                                        |
|                                            |        | Encephalitis       | Scape                                       | Roasted, applied                                                              |

|                               |        |                             |                 |                                                                                                                                                                   |
|-------------------------------|--------|-----------------------------|-----------------|-------------------------------------------------------------------------------------------------------------------------------------------------------------------|
|                               |        | and wounds<br>(animals)     | (Inflorescence) | over the wounds                                                                                                                                                   |
| <i>Aloe vera</i> L., B.S. 415 | Sábila | Diabetes and<br>cholesterol | Leaves and pulp | Liquefied,<br>together with<br><i>Opuntia ficus-<br/>indica</i> , ingest                                                                                          |
|                               |        | Kidney stone                | Leaves and pulp | Liquefied, ingest                                                                                                                                                 |
|                               |        | Gastritis                   | Pulp            | Leaves, peeled,<br>boiled mixed<br>with honey bee<br>and wine,<br>ingest;<br>liquefied,<br>together with<br>piña and<br><i>Opuntia ficus-<br/>indica</i> , ingest |
|                               |        | Acne                        | Pulp            | Mask on the<br>face; with<br>activated carbon<br>for the skin<br>spots                                                                                            |
|                               |        | Toothache                   | Leaves          | Crude, applied<br>in the affected                                                                                                                                 |

|                         |                 |                                                                                                               |
|-------------------------|-----------------|---------------------------------------------------------------------------------------------------------------|
|                         |                 | area                                                                                                          |
| Inflammation            | Leaves          | Roasted, applied<br>as cataplasm                                                                              |
| Blows                   | Leaves          | Crude, applied<br>as cataplasm                                                                                |
| Varicose<br>ulcers      | Leaves          | Crude, applied<br>as cataplasm                                                                                |
| Burns                   | Leaves          | Crude, applied<br>as cataplasm                                                                                |
| Stomach<br>inflammation | Leaves          | Liquefied,<br>together with<br><i>Opuntia<br/>engelmannii</i> and<br><i>Solanum<br/>tuberosum</i> ,<br>ingest |
| Flu                     | Leaves          | Pulp, applied on<br>the feet and<br>throat                                                                    |
| Abscesses               | Leaves          | Crude, chopped,<br>eat every day                                                                              |
| Backache                | Leaves          | Roasted, rub and<br>massage with<br>the pulp                                                                  |
| Wounds                  | Leaves and pulp | Cataplasm,                                                                                                    |

|                                                        |                               |                                             |             |                                                                                                                                                  |
|--------------------------------------------------------|-------------------------------|---------------------------------------------|-------------|--------------------------------------------------------------------------------------------------------------------------------------------------|
|                                                        |                               |                                             |             | mixed with (or<br>without) salt, as<br>cataplasm                                                                                                 |
|                                                        |                               | Weight loss                                 | Leaves      | Liquefied, ingest                                                                                                                                |
|                                                        |                               | Underarm                                    | Leaves pulp | Spreads in the<br>armpit                                                                                                                         |
|                                                        |                               | odor                                        |             |                                                                                                                                                  |
| <i>Sansevieria thyrsoflora</i><br>Thunb., B.S. 322     | Hierba de la<br>víbora, guaco | Insect, spider<br>and<br>snakebite<br>bites | Leaves      | Pulp, mixed<br>with <i>Allium</i><br><i>sativum</i> , <i>Citrus</i><br><i>limon</i> in alcohol;<br>or boiled,<br>applied in the<br>affected area |
| <i>Yucca carnerosana</i> (Trel.)<br>McKelvey, B.S. 379 | Palma<br>samandoca            | Indigestion                                 | Fruits      | Roast, milled<br>and boiled,<br>together with<br><i>Artemisia</i><br><i>ludoviciana</i> ,<br>ingest                                              |
| <i>Yucca filifera</i> Chaubaud,<br>B.S. 380            | Palma china                   | Snakebite                                   | Leaves      | Pulp, applied as<br>cataplasm                                                                                                                    |

AMARANTHACEAE

|                                                  |         |              |        |              |
|--------------------------------------------------|---------|--------------|--------|--------------|
| <i>Amaranthus palmeri</i> S.<br>Watson, B.S. 414 | Quelite | Constipation | Leaves | Salad, crude |
|--------------------------------------------------|---------|--------------|--------|--------------|

ANACARDIACEAE

|                                                   |           |                            |        |                                                                                                                                            |
|---------------------------------------------------|-----------|----------------------------|--------|--------------------------------------------------------------------------------------------------------------------------------------------|
| <i>Rhus virens</i> Lindh. ex A.<br>Gray, B.S. 378 | Lantrisco | Diabetes                   | Bark   | Boiled,<br>ingestion of<br>infusion                                                                                                        |
|                                                   |           | Migraine                   | Resin  | Spread on the<br>temples                                                                                                                   |
|                                                   |           | Gums and<br>loose teeth    | Leaves | Chew, but not<br>swallow                                                                                                                   |
|                                                   |           | High<br>pressure           | Leaves | Boiled,<br>ingestion of<br>infusion                                                                                                        |
| <i>Schinus molle</i> L., B.S. 323                 | Pirul     | Hives, rash<br>and allergy | Leaves | Boiled, take a<br>bath with<br>infusion                                                                                                    |
|                                                   |           | Loose teeth                | Leaves | Mouthwash                                                                                                                                  |
|                                                   |           | Cough                      | Leaves | Boiled, together<br>with<br><i>Gnaphalium<br/>canescens</i> leaves<br>and <i>Tamarindus<br/>indica</i> fruits,<br>ingestion of<br>infusion |
|                                                   |           | Kidney<br>disorders        | Leaves | Boiled,<br>ingestion of<br>infusion                                                                                                        |

|                    |             |                                                                                                                      |
|--------------------|-------------|----------------------------------------------------------------------------------------------------------------------|
| Menstrual<br>colic | Fruits      | Boiled, together<br>with <i>Mentha<br/>piperita</i> and<br><i>Tagetes lucida</i><br>leaves, ingestion<br>of infusion |
| Headache           | Leaves      | Boiled,<br>ingestion of<br>infusion                                                                                  |
| Fright             | Whole plant | Pass it over the<br>body                                                                                             |

APIACEAE

|                                           |          |                   |                     |                                                                                                             |
|-------------------------------------------|----------|-------------------|---------------------|-------------------------------------------------------------------------------------------------------------|
| <i>Apium graveolens</i> L., B.S.<br>377   | Apio     | Cholesterol       | Leaves and<br>stems | Liquefied,<br>together with<br><i>Citrus paradisi</i><br>and <i>Ananas<br/>comosus</i> fruit<br>pulp, salad |
|                                           |          | Diabetes          | Leaves and<br>stems | Liquefied,<br>together with<br><i>Citrus paradisi</i> ,<br>ingest                                           |
| <i>Coriandrum sativum</i> L., B.S.<br>413 | Cilantro | Liver<br>diseases | Leaves and<br>stems | Boiled,<br>ingestion of<br>infusion                                                                         |

|                                                    |                    |                                                 |                     |                                     |
|----------------------------------------------------|--------------------|-------------------------------------------------|---------------------|-------------------------------------|
| <i>Cuminum cyminum</i> L., B.S.<br>417             | Comino             | Itch and<br>drool when<br>babies are<br>tething | Leaves and<br>stems | Boiled with<br>coconut fibers       |
| <i>Eryngium heterophyllum</i><br>Engelm., B.S. 327 | Hierba del<br>sapo | Kidney and<br>prostate<br>diseases              | Leaves              | Boiled,<br>ingestion of<br>infusion |
| <i>Foeniculum vulgare</i> Mill.,<br>B.S. 412       | Hinojo             | Menstrual<br>colic                              | Leaves and<br>stems | Boiled,<br>ingestion of<br>infusion |
|                                                    |                    | Abortive                                        | Leaves and<br>stems | Boiled,<br>ingestion of<br>infusion |
|                                                    |                    | Stomach<br>ache                                 | Leaves              | Boiled,<br>ingestion of<br>infusion |
|                                                    |                    | Gastritis                                       | Leaves              | Boiled,<br>ingestion of<br>infusion |
|                                                    |                    | Fright                                          | Whole plant         | Pass through the<br>body            |
|                                                    |                    | Alcoholism                                      | Leaves              | Boiled,<br>ingestion of<br>infusion |

#### ARACEAE

|                                |         |                   |        |                                |
|--------------------------------|---------|-------------------|--------|--------------------------------|
| <i>Anthurium</i> sp., B.S. 376 | Lampazo | Rash and sunspost | Leaves | Applied over the affected area |
|--------------------------------|---------|-------------------|--------|--------------------------------|

ASTERACEAE

|                                                 |                          |                  |                  |                                                             |
|-------------------------------------------------|--------------------------|------------------|------------------|-------------------------------------------------------------|
| <i>Artemisia ludoviciana</i> Nutt.,<br>B.S. 326 | Estafiate o<br>simonillo | Diarrhea         | Leaves and stems | Boiled, ingestion of infusion                               |
|                                                 |                          | Colic            | Leaves and stems | Boiled, ingestion of infusion                               |
|                                                 |                          | High fever       | Leaves and stems | Boiled, ingestion of infusion                               |
|                                                 |                          | Flu              | Leaves and stems | Boiled, ingestion of infusion                               |
|                                                 |                          | Promote appetite | Leaves and stems | Boiled, ingestion of infusion                               |
|                                                 |                          | Indigestion      | Leaves and stems | Boiled, ingestion of infusion                               |
|                                                 |                          | Gastritis        | Leaves           | Boiled, together with <i>Mentha piperita</i> , ingestion of |

|                                             |             |                                       |                  |                                                                                               |
|---------------------------------------------|-------------|---------------------------------------|------------------|-----------------------------------------------------------------------------------------------|
|                                             |             |                                       |                  | infusion                                                                                      |
|                                             |             | Stomach ache and Constipation (adult) | Leaves           | Boiled, together with <i>Marrubium vulgare</i> , ingestion of infusion                        |
|                                             |             | Constipated (babies)                  | Leaves           | Toasted, milled and boiled, together with <i>Matricaria recutita</i> , ingestion of infusion  |
| <i>Achillea millefolium</i> L., B.S. 418    | Real de oro | Colic, stomach ache and diarrhea      | Leaves and stems | Boiled, ingestion of infusion                                                                 |
| <i>Ambrosia confertiflora</i> DC., B.S. 324 | Ambrosia    | Stomach ache                          | Leaves           | Boiled, ingestion of infusion                                                                 |
|                                             |             | Colic                                 | Leaves           | Boiled, together with <i>Marrubium vulgare</i> and <i>Mentha piperita</i> leaves and alcohol, |

|                                                            |                     |                   |             |                                                                                                                       |
|------------------------------------------------------------|---------------------|-------------------|-------------|-----------------------------------------------------------------------------------------------------------------------|
|                                                            |                     |                   |             | ingestion of<br>infusion                                                                                              |
| <i>Baccharis salicifolia</i> (Ruiz & Pav.) Pers., B.S. 436 | Jarilla o escobilla | Fright            | Whole plant | Pass it over the body                                                                                                 |
| 419                                                        | Reynas              | Headaches         | Flowers     | Boiled,<br>ingestion of<br>infusion                                                                                   |
|                                                            |                     | Colic             | Flowers     | Boiled,<br>ingestion of<br>infusion                                                                                   |
|                                                            |                     | Neuralgia         | Flowers     | Boiled,<br>ingestion of<br>infusion                                                                                   |
|                                                            |                     | Cancer prevention | Flowers     | Boiled,<br>ingestion of<br>infusion                                                                                   |
|                                                            |                     | Tachycardia       | Flowers     | Boiled, together<br>with <i>Litsea pringlei</i> and<br><i>Matricaria recutita</i> leaves,<br>ingestion of<br>infusion |
|                                                            |                     | Chest pain        | Flowers     | Boiled, together<br>with                                                                                              |

|                                 |             |              |            |                         |
|---------------------------------|-------------|--------------|------------|-------------------------|
|                                 |             |              |            | <i>Pelargonium</i>      |
|                                 |             |              |            | <i>hortorum</i> leaves, |
|                                 |             |              |            | ingestion of            |
|                                 |             |              |            | infusion                |
| <i>Chrysactinia mexicana</i> A. | Hierba de   | Backache     | Leaves and | Boiled,                 |
| Gray, B.S. 325                  | San Nicolás |              | flowers    | ingestion of            |
|                                 |             |              |            | infusion                |
|                                 |             | Inflammation | Leaves and | Boiled, together        |
|                                 |             | postpartum   | flowers    | with <i>Mentha</i>      |
|                                 |             |              |            | <i>piperita</i> leaves, |
|                                 |             |              |            | ingestion of            |
|                                 |             |              |            | infusion                |
|                                 |             | Menstrual    | Leaves and | Boiled,                 |
|                                 |             | cramps       | flowers    | ingestion of            |
|                                 |             |              |            | infusion                |
|                                 |             | Bronchitis   | Leaves and | Boiled,                 |
|                                 |             |              | flowers    | ingestion of            |
|                                 |             |              |            | infusion                |
|                                 |             | Stomach      | Leaves and | Boiled,                 |
|                                 |             | ache         | flowers    | ingestion of            |
|                                 |             |              |            | infusion                |
|                                 |             | Diarrhea     | Leaves and | Boiled,                 |
|                                 |             |              | flowers    | ingestion of            |
|                                 |             |              |            | infusion                |
|                                 |             | Headaches    | Leaves and | Boiled, together        |

|                                                   |           |                  |                    |                                                                                                     |
|---------------------------------------------------|-----------|------------------|--------------------|-----------------------------------------------------------------------------------------------------|
|                                                   |           |                  | flowers            | with <i>Allium sativum</i> and <i>Allium cepa</i> , ingestion of infusion                           |
|                                                   |           | Sexual impotence | Leaves and flowers | Boiled, together with honey bee and <i>Coriandrum sativum</i> seeds, ingestion of infusion          |
|                                                   |           | Infertility      | Leaves and flowers | Boiled, ingestion of infusion for 27 days, non in menstruation, after 15 days, she can get pregnant |
| <i>Dyssodia setifolia</i> B. L.<br>Rob., B.S. 411 | Parraleña | Chills           | Leaves             | Boiled, ingestion of infusion                                                                       |
|                                                   |           | Fever            | Leaves             | Boiled, ingestion of infusion                                                                       |

|                                           |        |                 |                     |                                                                                                                |
|-------------------------------------------|--------|-----------------|---------------------|----------------------------------------------------------------------------------------------------------------|
| <i>Flourensia cernua</i> DC., B.S.<br>410 | Hojasé | General pain    | Leaves and<br>stems | Boiled,<br>ingestion of<br>infusion                                                                            |
|                                           |        | Spleen          | Leaves and<br>stems | Boiled,<br>ingestion of<br>infusion                                                                            |
|                                           |        | Infections      | Leaves and<br>stems | Boiled,<br>ingestion of<br>infusion                                                                            |
|                                           |        | Diarrhea        | Leaves and<br>stems | Boiled,<br>ingestion of<br>infusion                                                                            |
|                                           |        | Stomach<br>ache | Leaves              | Boiled,<br>ingestion of<br>infusion or<br>together with<br>wine (optional),<br>ingest                          |
|                                           |        | Hindrance       | Leaves              | Toast and mill,<br>mixing with oil<br>and take a<br>spoon, or the<br>milled one<br>boiled, and<br>ingestion of |

|                                                       |           |                  |                     |                                                                                                                                                                                                                                                                                                             |
|-------------------------------------------------------|-----------|------------------|---------------------|-------------------------------------------------------------------------------------------------------------------------------------------------------------------------------------------------------------------------------------------------------------------------------------------------------------|
|                                                       |           |                  |                     | infusion                                                                                                                                                                                                                                                                                                    |
| <i>Gochnatia hypoleuca</i> (DC.)<br>A. Gray, B.S. 375 | Ocotillo  | Cough            | Leaves              | Boiled, mixed<br>with honey bee,<br>ingestion of<br>infusion                                                                                                                                                                                                                                                |
|                                                       |           | Stomach<br>ache  | Leaves              | Boiled,<br>ingestion of<br>infusion                                                                                                                                                                                                                                                                         |
|                                                       |           | High<br>pressure | Leaves              | Boiled,<br>ingestion of<br>infusion                                                                                                                                                                                                                                                                         |
| <i>Gnaphalium canescens</i> DC.,<br>B.S. 372          | Gordolobo | Cough            | Leaves and<br>stems | Boiled, together<br>with <i>Eucalyptus</i><br>and <i>Matricaria</i><br><i>recutita</i> leaves;<br>mixed with a<br>tiny bit of <i>Pinus</i><br><i>teocote</i> bark<br>(inhaling<br>vapors); with<br><i>Artemisia</i><br><i>ludoviciana</i><br>leaves or with<br><i>Grindelia</i><br><i>inuloides</i> leaves, |

|                         |                     |                                                                                |
|-------------------------|---------------------|--------------------------------------------------------------------------------|
|                         |                     | honey bee and<br><i>Citrus limon</i><br>leaves, ingestion<br>of infusion       |
| Expectorant             | Whole plant         | Boiled,<br>ingestion of<br>infusion                                            |
| Chest<br>congestion     | Whole plant         | Boiled,<br>ingestion of<br>infusion                                            |
| Sinusitis               | Leaves and<br>stems | Boiled,<br>ingestion of<br>infusion                                            |
| Phlegm                  | Leaves and<br>stems | Boiled,<br>ingestion of<br>infusion mixed<br>with honey bee<br>and lemon juice |
| Sore throat             | Whole plant         | Boiled,<br>ingestion of<br>infusion                                            |
| Indigestion<br>(babies) | Leaves and<br>stems | Boiled,<br>ingestion of<br>infusion                                            |
| Stomach                 | Leaves and          | Boiled,                                                                        |

|                                                                       |          |                    |                       |                                             |
|-----------------------------------------------------------------------|----------|--------------------|-----------------------|---------------------------------------------|
|                                                                       |          | infection          | stems                 | ingestion of<br>infusion                    |
| <i>Grindelia inuloides</i> Willd.<br>var. <i>inuloides</i> , B.S. 420 | Árnica   | Internal<br>wounds | Leaves and<br>flowers | Boiled,<br>ingestion of<br>infusion         |
|                                                                       |          | Gastritis          | Leaves and<br>flowers | Boiled,<br>ingestion of<br>infusion         |
|                                                                       |          | Inflammation       | Leaves and<br>flowers | Boiled,<br>ingestion of<br>infusion         |
|                                                                       |          | Diabetes           | Leaves and<br>flowers | Boiled,<br>ingestion of<br>infusion         |
|                                                                       |          | Hematoma           | Leaves                | Boiled,<br>ingestion of<br>infusion         |
|                                                                       |          | Pains              | Leaves                | Boiled, infusion<br>applied as<br>cataplasm |
|                                                                       |          | Ulcer scar         | Leaves                | Boiled,<br>ingestion of<br>infusion         |
| <i>Gymnosperma glutinosum</i><br>(Spreng.) Less., B.S. 421            | Pegajosa | Broken<br>bones    | Leaves                | Fractured leg is<br>“plastered” with        |

|                                            |            |                            |                              |                                                                                                    |
|--------------------------------------------|------------|----------------------------|------------------------------|----------------------------------------------------------------------------------------------------|
|                                            |            | (animals)                  |                              | leaves and<br>covered with a<br>bandage                                                            |
| <i>Matricaria recutita</i> L., B.S.<br>437 | Manzanilla | Menstrual<br>colic         | Leaves, stems<br>and flowers | Boiled,<br>ingestion of<br>infusion                                                                |
|                                            |            | Inflammation<br>postpartum | Leaves, stems<br>and flowers | Boiled,<br>ingestion of<br>infusion                                                                |
|                                            |            | High<br>temperature        | Leaves, stems<br>and flowers | Boiled,<br>ingestion of<br>infusion                                                                |
|                                            |            | Stomach<br>ache            | Leaves, stems<br>and flowers | Boiled,<br>ingestion of<br>infusion, or<br>(optional)<br>together with<br><i>Aloysia triphylla</i> |
|                                            |            | Eye<br>infections          | Leaves, stems<br>and flowers | Boiled, solution<br>applied with a<br>cotton wad                                                   |
|                                            |            | Hematoma                   | Leaves, stems<br>and flowers | Boiled, solution<br>applied to the<br>wound with a<br>cotton wad                                   |

|                                      |                              |                                                                                                                                         |
|--------------------------------------|------------------------------|-----------------------------------------------------------------------------------------------------------------------------------------|
| Dizziness                            | Leaves, stems<br>and flowers | Boiled, together<br>with <i>Litsea<br/>pringlei</i> leaves<br>and<br><i>Cinnamomum</i> ,<br>ingestion of<br>infusion                    |
| Spleen                               | Leaves, stems<br>and flowers | Boiled, together<br>with <i>Litsea<br/>pringlei</i> leaves<br>and/or <i>Citrus<br/>sinensis</i> fruit<br>peel, ingestion<br>of infusion |
| Measles,<br>rubella and<br>allergies | Leaves, stems<br>and flowers | Boiled, take a<br>bath with the<br>infusion                                                                                             |
| Hair dye                             | Leaves, stems<br>and flowers | Boiled, solution<br>applied in the<br>hair                                                                                              |
| Intestinal<br>lavage                 | Leaves, stems<br>and flowers | Boiled, ingest<br>three<br>tablespoons of<br>flaxseed<br>together with                                                                  |

|                                  |          |                |                           |                                                                 |
|----------------------------------|----------|----------------|---------------------------|-----------------------------------------------------------------|
|                                  |          |                |                           | half onion, three times at day; boiled, together with flaxseed, |
|                                  |          |                |                           | <i>Flourensia cernua</i> leaves, and <i>Citrus lemon</i> juice  |
|                                  |          |                |                           | ingestion of infusion,                                          |
|                                  |          | Grains (mouth) | Leaves, stems and flowers | Gargles with the solution                                       |
| <i>Tagetes lucida</i> Cav., B.S. | Yerbaniz | Nervousness    | Whole plant               | Boiled, ingestion of infusion                                   |
| 422                              |          | Insomnia       | Whole plant               | Boiled, ingestion of infusion                                   |
|                                  |          | Chills         | Whole plant               | Boiled, ingestion of infusion                                   |
|                                  |          | Bone pain      | Whole plant               | Boiled, ingestion of infusion                                   |
|                                  |          | Cough          | Whole plant               | Boiled,                                                         |

|                           |             |                                                                                                     |
|---------------------------|-------------|-----------------------------------------------------------------------------------------------------|
|                           |             | ingestion of<br>infusion                                                                            |
| Internal pain             | Whole plant | Boiled, together<br>with canela and<br><i>Matricaria<br/>recutita</i> ,<br>ingestion of<br>infusion |
| Hair loss                 | Whole plant | Boiled, solution<br>applied together<br>with shampoo                                                |
| Snakebite                 | Whole plant | Dried plant into<br>alcohol, wash<br>the affected area                                              |
| Fright                    | Whole plant | Scrub the dried<br>plant throughout<br>the body                                                     |
| Cramps                    | Whole plant | Dried plant into<br>alcohol, wash<br>throughout the<br>affected area                                |
| Leg fractures<br>(cattle) | Leaves      | Boiled, poultice<br>with a gauze, the<br>leg is<br>“plastered” with                                 |

|                                                    |          |                    |                               |                                                                                                                   |
|----------------------------------------------------|----------|--------------------|-------------------------------|-------------------------------------------------------------------------------------------------------------------|
|                                                    |          |                    |                               | leaves and<br>covered with a<br>bandage                                                                           |
| <i>Tanacetum parthenium</i> Sch.<br>Bip., B.S. 438 | Altamisa | Stomachache        | Leaves, stems<br>and flowers  | Boiled,<br>ingestion of<br>infusion                                                                               |
|                                                    |          | Menstrual<br>colic | Leaves                        | Boiled,<br>ingestion of<br>infusion, and<br>rolled leaves<br>soaked in<br>alcohol place<br>them in the<br>stomach |
|                                                    |          | Diarrhea           | Leaves, stems,<br>and flowers | Boiled,<br>ingestion of<br>infusion                                                                               |
|                                                    |          | Internal pain      | Leaves                        | Boiled,<br>ingestion of<br>infusion                                                                               |
|                                                    |          | Cough              | Leaves                        | Boiled,<br>ingestion of<br>infusion                                                                               |
|                                                    |          | Asthma             | Leaves                        | Boiled,<br>ingestion of                                                                                           |

|                                                     |                   |                         |                      |                                                                                                           |
|-----------------------------------------------------|-------------------|-------------------------|----------------------|-----------------------------------------------------------------------------------------------------------|
|                                                     |                   |                         |                      | infusion                                                                                                  |
|                                                     |                   | Earache and<br>deafness | Leaves<br>(meristem) | Rolled leaves,<br>mixed with vick<br>vaporub and put<br>in the ear                                        |
|                                                     |                   | Fright                  | Whole plant          | Scrub the dried<br>plant throughout<br>the body                                                           |
| <i>Taraxacum officinale</i> F.H.<br>Wigg., B.S. 409 | Diente de<br>león | Liver                   | Whole plant          | Boiled,<br>ingestion of<br>infusion                                                                       |
|                                                     |                   | Kidney<br>infection     | Whole plant          | Boiled,<br>ingestion of<br>infusion                                                                       |
|                                                     |                   | Abortive                | Whole plant          | Boiled,<br>ingestion of<br>infusion                                                                       |
|                                                     |                   | Gumboil                 | Leaves               | Boiled, infusion<br>applied in<br>affected area                                                           |
|                                                     |                   | Hair loss               | Leaves               | Boiled, infusion<br>together with<br><i>Jatropha dioica</i><br>and <i>Tragia</i><br><i>ramosa</i> leaves, |

|                                                                         |        |                                    |             |                                     |
|-------------------------------------------------------------------------|--------|------------------------------------|-------------|-------------------------------------|
|                                                                         |        |                                    |             | applied to the<br>hair              |
|                                                                         |        | Promote<br>menstruation            | Whole plant | Boiled,<br>ingestion of<br>infusion |
| <i>Trixis californica</i> Kellogg<br>var. <i>californica</i> , B.S. 374 | Árnica | Internal and<br>external<br>wounds | Whole plant | Boiled,<br>ingestion of<br>infusion |
|                                                                         |        | Gastritis                          | Whole plant | Boiled,<br>ingestion of<br>infusion |
|                                                                         |        | Stomach<br>ache                    | Whole plant | Boiled,<br>ingestion of<br>infusion |
|                                                                         |        | Prostate<br>cancer                 | Whole plant | Boiled,<br>ingestion of<br>infusion |
|                                                                         |        | Indigestion                        | Whole plant | Boiled,<br>ingestion of<br>infusion |
|                                                                         |        | Improve<br>blood<br>circulation    | Whole plant | Boiled,<br>ingestion of<br>infusion |
|                                                                         |        | Wash private<br>parts              | Whole plant | Boiled, infusion<br>together with   |

*Aloe vera,*

apply three  
times at day

Blows                      Leaves and  
                                         flowers                      Infusion, apply  
                                                                                      to the affected  
                                                                                      area

Reduce                      Whole plant  
inflammation                                              Infusion, apply  
                                                                                      to the affected  
                                                                                      area

Ulcer                                      Whole plant                      Ingestion of  
                                                                                      infusion

Mottled skin                      Whole plant                      Infusion, apply  
                                                                                      to the affected  
                                                                                      area

Healing                                      Whole plant                      Infusion, apply  
                                                                                      to the affected  
                                                                                      area

Rheumatic                      Whole plant                      Boiled, let stand  
pains                                              for several days  
                                                                                      together with  
                                                                                      “mezcal” and  
                                                                                      rub the affected  
                                                                                      area

*Zinnia elegans* Sessé &  
Moc., E.E. 22432

Cartulina

Cancer  
prevention

Flowers

Boiled,  
ingestion of

infusion

BORAGINACEAE

|                                                             |            |                                                       |                           |                                                                                                   |
|-------------------------------------------------------------|------------|-------------------------------------------------------|---------------------------|---------------------------------------------------------------------------------------------------|
| <i>Borago officinalis</i> L., B.S.<br>408                   | Borraja    | Measles                                               | Leaves                    | Boiled,<br>ingestion of<br>infusion                                                               |
|                                                             |            | Cough                                                 | Leaves                    | Boiled, together<br>with canela and<br><i>Mentha piperita</i><br>leaves, ingestion<br>of infusion |
|                                                             |            | High<br>temperature                                   | Leaves                    | Boiled,<br>ingestion of<br>infusion                                                               |
|                                                             |            | Infection<br>caused by<br>insects or<br>spiders sting | Young leaves              | Milled, spread<br>on the affected<br>part                                                         |
| <i>Cordia boissieri</i> A. DC.,<br>B.S. 407                 | Anacahuita | Cough                                                 | Bark, fruits and<br>roots | Boiled,<br>ingestion of<br>infusion                                                               |
| <i>Tiquilia canescens</i> (DC.)<br>A.T Richardson, B.S. 449 | Ventosidad | Chest pain                                            | Leaves                    | Boiled,<br>ingestion of<br>infusion                                                               |

BRASSICACEAE

|                                      |           |         |             |         |
|--------------------------------------|-----------|---------|-------------|---------|
| <i>Eruca sativa</i> (L.) Mill., B.S. | Colesilla | Stomach | Whole plant | Boiled, |
|--------------------------------------|-----------|---------|-------------|---------|

|                                                                            |            |               |      |                     |                                                                              |
|----------------------------------------------------------------------------|------------|---------------|------|---------------------|------------------------------------------------------------------------------|
| 439                                                                        |            |               | ache |                     | ingestion of<br>infusion                                                     |
| <i>Lepidium virginicum</i> L., B.S.                                        | Hierba del | Stomach       |      | Leaves and          | Boiled,                                                                      |
| 406                                                                        | pajarito   | ache          |      | stems               | ingestion of<br>infusion                                                     |
|                                                                            |            | Diarrhea      |      | Leaves and<br>stems | Boiled,<br>ingestion of<br>infusion                                          |
|                                                                            |            | High fever    |      | Leaves and<br>stems | Boiled,<br>ingestion of<br>infusion                                          |
| <i>Rorippa nasturtium-<br/>aquaticum</i> (L.) Schinz &<br>Thell., B.S. 450 | Berro      | Cirrhosis     |      | Leaves              | Disinfected,<br>eaten raw                                                    |
| <i>Sisymbrium irio</i> L, B.S. 451                                         | Mostaza    | Eye infection |      | Leaves              | Boiled, solution<br>applied into the<br>eyes with a<br>cotton wad            |
|                                                                            |            | Headaches     |      | Seeds               | Milled, apply<br>(stick) on<br>temples with<br><i>Pinus teocote</i><br>resin |
|                                                                            |            | Earache       |      | Leaves              | Place a piece of<br>leaf into the ear                                        |

|                  |       |                                                                                 |
|------------------|-------|---------------------------------------------------------------------------------|
| High temperature | Seeds | Milled seeds, apply (stick with fat) on the temples (“chiquiadores”)            |
| Mumps            | Seeds | Milled, mixed with <i>Opuntia imbricata</i> pulp, place it in the affected area |

BROMELIACEAE

|                                         |         |       |                    |                                                       |
|-----------------------------------------|---------|-------|--------------------|-------------------------------------------------------|
| <i>Tillandsia usenoides</i> L. B.S. 466 | Paistle | Burns | Leaves and flowers | Milled, mixed with glycerine, spread in affected area |
|-----------------------------------------|---------|-------|--------------------|-------------------------------------------------------|

BUDDLEJACEAE

|                                              |           |              |                  |                                                                                                             |
|----------------------------------------------|-----------|--------------|------------------|-------------------------------------------------------------------------------------------------------------|
| <i>Buddleja scordioides</i> Kunth., B.S. 405 | Escobilla | Colic        | Leaves and stems | Boiled, ingestion of infusion                                                                               |
|                                              |           | Stomach ache | Leaves           | Boiled, together with <i>Marrubium vulgare</i> or/and <i>Opuntia engelmannii</i> var. <i>cuija</i> root and |

|                                                                                          |         |                                          | <i>Prosopis glandulosa</i> bark, |                                                                                                    |
|------------------------------------------------------------------------------------------|---------|------------------------------------------|----------------------------------|----------------------------------------------------------------------------------------------------|
| <i>Buddleja cordata</i> Humb. ssp. <i>tomentella</i> (Standl.) E. M.<br>Norman, B.S. 371 | Tepozán | Wounds                                   | Leaves                           | ingestion of<br>infusion<br>Boiled, infusion<br>applied in the<br>wound                            |
|                                                                                          |         | Toothache                                | Leaves                           | Smear fat on<br>leaf, and<br>adhered it in the<br>affected area                                    |
|                                                                                          |         | Neuralgia                                | Leaves                           | Boiled,<br>ingestion of<br>infusion                                                                |
|                                                                                          |         | Insects,<br>spiders, and<br>snakes bites | Leaves                           | Boiled, mixed<br>with <i>Pinpinella</i><br><i>anisum</i> , wash<br>the wounds with<br>the solution |
|                                                                                          |         | Anemia                                   | Leaves                           | Boiled,<br>ingestion of<br>infusion                                                                |
|                                                                                          |         | Diabetes                                 | Leaves                           | Boiled,<br>ingestion of<br>infusion                                                                |

|                         |        |                                                                           |
|-------------------------|--------|---------------------------------------------------------------------------|
| Earache and<br>eye pain | Leaves | Roasted, smear<br>fat and attach it<br>on the temples<br>("chiquiadores") |
| Hysterics               | Leaves | Boiled,<br>ingestion of<br>infusion                                       |
| Bone pain               | Leaves | Boiled,<br>ingestion of<br>infusion                                       |

#### CACTACEAE

|                                                                |            |                           |             |                                                                  |
|----------------------------------------------------------------|------------|---------------------------|-------------|------------------------------------------------------------------|
| <i>Ariocarpus retusus</i><br>Scheidw., B.S. 401                | Chaute     | Calmativ<br>(Psychedelic) | Whole plant | Eaten crude                                                      |
| <i>Cylindropuntia imbricata</i><br>(Haw.) F.M. Knuth, B.S. 400 | Coyonoxtle | Inflamed<br>tonsils       | Fruit       | Roasted,<br>macerated,<br>applied<br>externally on the<br>throat |
|                                                                |            | Migraine                  | Fruit       | Boiled, the first<br>drink of the day<br>before first meal       |
|                                                                |            | Diabetes                  | Fruit       | Eat raw                                                          |
|                                                                |            | Baldness                  | Fruit       | Boiled,<br>macerated,<br>mixed with                              |

|                                   |           |          |        |                     |
|-----------------------------------|-----------|----------|--------|---------------------|
|                                   |           |          |        | shampoo             |
|                                   |           | General  | Stems  | Pulp applied as     |
|                                   |           | wounds   |        | cataplasm           |
| <i>Cylindropuntia leptocaulis</i> | Tasajillo | Dandruff | Fruits | Cut into pieces,    |
| (DC.) F.M. Knuth, B.S. 370        |           |          |        | put them in         |
|                                   |           |          |        | water for twelve    |
|                                   |           |          |        | hours, use as       |
|                                   |           |          |        | shampoo, the        |
|                                   |           |          |        | foam produced       |
|                                   |           |          |        | must be let act     |
|                                   |           |          |        | to eliminate        |
|                                   |           |          |        | dandruff            |
| <i>Echinocereus poselgeri</i>     | Sacasil   | Broken   | Root   | Macerated, band     |
| Lem., B.S. 399                    |           | bones    |        | the affected part,  |
|                                   |           |          |        | place the pulp      |
|                                   |           |          |        | over the band       |
|                                   |           |          |        | (not directly, the  |
|                                   |           |          |        | pulp is irritant to |
|                                   |           |          |        | the skin if place   |
|                                   |           |          |        | directly) and       |
|                                   |           |          |        | band again, tight   |
|                                   |           |          |        | the bands,          |
|                                   |           |          |        | avoiding bones      |
|                                   |           |          |        | movement            |
|                                   |           | Burns    | Root   | Boiled, use as in   |

|                                                                                              |                         |                                |             |                                                                                                                                                   |
|----------------------------------------------------------------------------------------------|-------------------------|--------------------------------|-------------|---------------------------------------------------------------------------------------------------------------------------------------------------|
|                                                                                              |                         |                                |             | broken bones                                                                                                                                      |
| <i>Lophophora williamsii</i><br>(Salm-Dyck) J. M. Coult.,<br>B.S. 402                        | Peyote                  | Calmativa<br>(Psychedelic)     | Whole plant | Eaten crude                                                                                                                                       |
| <i>Marginatocereus marginatus</i><br>(DC.) Backeb., B.S. 404                                 | Cardón u<br>órgano      | Fractured<br>legs<br>(animals) | Stems pulp  | Macerated,<br>applied as<br>cataplasm and<br>bandage it                                                                                           |
| <i>Opuntia engelmannii</i> Salm-<br>Dyck ex Engelm. var. <i>cuija</i><br>Griffiths, B.S. 398 | Nopal cuijo             | Stomach<br>ache                | Stem pulp   | Liquefied,<br>mixed with<br>pieces of<br>mezquite bark,<br><i>Baccharis</i><br><i>salicifolia</i><br>leaves, and few<br>lemon drops,<br>ingestion |
| <i>Opuntia ficus-indica</i> L., B.S.<br>403                                                  | Nopal de<br>todo el año | Diabetes                       | Stem pulp   | Liquefied<br>together with<br><i>Aloe vera</i> pulp,<br>ingest                                                                                    |
|                                                                                              |                         | Tumors                         | Stem pulp   | Cataplasm over<br>the tumor                                                                                                                       |
|                                                                                              |                         | Inflammation                   | Stem pulp   | Cataplasm over<br>the                                                                                                                             |

inflammation

area

High                      Stem pulp                      Liquefied, ingest  
pressure

Constipation                      Stem pulp                      Liquefied, ingest

Diarrhea and                      Root                      Cut into pieces,  
vomit                      boiled, ingest

Gastritis                      Stem pulp                      Liquefied, ingest

#### CANNACEAE

|                                  |       |                       |        |                                                                                                                                                                                                    |
|----------------------------------|-------|-----------------------|--------|----------------------------------------------------------------------------------------------------------------------------------------------------------------------------------------------------|
| <i>Canna indica</i> L., B.S. 397 | Coyol | Epidermical<br>wounds | Leaves | Crude, smear<br>fat and apply it<br>as cataplasm<br>over the wound                                                                                                                                 |
|                                  |       | Stomach<br>ache       | Leaves | Roasted, mixed<br>with ambrosia<br>leaves, pieces of<br>onion, white and<br>yolk of an egg,<br>and yerbabuena,<br>all of them<br>embed in<br>alcohol, place<br>the mix over the<br>abdominal area, |

until pain  
 disappear  
 Macerated,  
 applied directly  
 over the grain(s)  
 Macerated,  
 applied directly  
 over the  
 inflammation  
 area

Pruritus      Root pulp

Inflammation      Root pulp

CAPRIFOLIACEAE

*Sambucus mexicana* Sarg.,      Sauco  
 B.S. 396

Bronchitis,      Flowers  
 cough

Boiled, together  
 with eucalypt  
 leaves, honey  
 bee, and  
*Bougainvillea*  
*glabra* bracts,  
 ingestion of  
 infusion

Asthma      Leaves

Boiled,  
 ingestion of  
 infusion

High      Leaves and  
 temperature      flowers

Boiled, take a  
 bath with the  
 solution

|              |         |                                                                                                                    |
|--------------|---------|--------------------------------------------------------------------------------------------------------------------|
| Inflammation | Flowers | Boiled, soak a towel, place over the inflammation                                                                  |
| Stomach ache | Flowers | Boiled, ingestion of infusion                                                                                      |
| Pruritus     | Bark    | Macerated, together with sábila leaves and aspirin pill, the ointment resultant applied directly over the grain(s) |

#### CHENOPODIACEAE

|                                                 |         |                      |                        |                                                                                                                 |
|-------------------------------------------------|---------|----------------------|------------------------|-----------------------------------------------------------------------------------------------------------------|
| <i>Chenopodium ambrosioides</i><br>L., B.S. 467 | Epazote | Intestinal parasites | Leaves                 | Boiled in water or milk, mixed with <i>Mentha piperita</i> leaves, the first drink of the day before first meal |
|                                                 |         | Stomach ache         | Leaves, stems and root | Boiled, ingestion of                                                                                            |

|                                                   |                     |                |                  |                                                                      |
|---------------------------------------------------|---------------------|----------------|------------------|----------------------------------------------------------------------|
|                                                   |                     |                |                  | infusion                                                             |
|                                                   |                     | Diarrhea       | Leaves and stems | Boiled, ingestion of infusion                                        |
|                                                   |                     | Colic          | Leaves           | Boiled, ingestion of infusion                                        |
|                                                   |                     | Cough          | Leaves and stems | Boiled, together with hierba del golpe leaves, ingestion of infusion |
|                                                   |                     | Improve memory | Leaves and stems | Boiled, ingestion of infusion                                        |
| <i>Chenopodium graveolens</i><br>Willd., B.S. 468 | Epazote de zorrillo | Cough          | Leaves and stems | Boiled, ingestion of infusion                                        |
|                                                   |                     | Bronchitis     | Leaves and stems | Boiled, ingestion of infusion                                        |
|                                                   |                     | Kidney stones  | Leaves and stems | Boiled, ingestion of infusion                                        |
|                                                   |                     | External       | Leaves           | Boiled, solution                                                     |

|                 |                     |                                     |
|-----------------|---------------------|-------------------------------------|
| wounds          |                     | used to wash the<br>wound           |
| Stomach<br>ache | Leaves and<br>stems | Boiled,<br>ingestion of<br>infusion |
| Colic           | Leaves and<br>stems | Boiled,<br>ingestion of<br>infusion |
| Suffocate       | Leaves              | Boiled,<br>ingestion of<br>infusion |
| Constipate      | Leaves              | Boiled,<br>ingestion of<br>infusion |

#### COMMELINACEAE

|                                                      |                            |                     |                     |                                     |
|------------------------------------------------------|----------------------------|---------------------|---------------------|-------------------------------------|
| <i>Commelina dianthifolia</i><br>[Delile,], B.S. 369 | Hierba de la<br>golondrina | Diarrhea            | Leaves and<br>stems | Boiled,<br>ingestion of<br>infusion |
|                                                      |                            | Vomit               | Leaves and<br>stems | Boiled,<br>ingestion of<br>infusion |
|                                                      |                            | High<br>temperature | Leaves and<br>stems | Boiled,<br>ingestion of<br>infusion |
|                                                      |                            | Eyes                | Flowers             | Sap drops                           |



|                                              |  |             |        |                                                  |
|----------------------------------------------|--|-------------|--------|--------------------------------------------------|
|                                              |  |             |        | baking soda,<br>apply over the<br>gumboil        |
| <i>Sedum diffusum</i> S. Watson,<br>B.S. 395 |  | Tachycardia | Leaves | Chew, macerate<br>and apply it over<br>the chest |

CUCURBITACEAE

|                                                  |                    |                                 |        |                                            |
|--------------------------------------------------|--------------------|---------------------------------|--------|--------------------------------------------|
| <i>Cucumis sativus</i> L., B.S. 473              | Pepino             | Hair<br>restoration             | Fruit  | Boiled, applied<br>to the hair             |
| <i>Cucurbita foetidissima</i><br>Kunth, B.S. 394 | Calabacila<br>loca | Hand cleaner                    | Fruit  | Macerated, wash<br>hands with the<br>pulp  |
| <i>Cucurbita moschata</i><br>Duchesne, B.S. 471  | Calabaza           | Backache                        | Fruit  | Mashed, applied<br>directly on the<br>back |
| <i>Sechium edule</i> Sw., B.S. 472               | Chayote            | Improve<br>blood<br>circulation | Fruits | Cook, soup                                 |

CUPRESSACEAE

|                                                |       |             |                           |                                                              |
|------------------------------------------------|-------|-------------|---------------------------|--------------------------------------------------------------|
| <i>Cupressus arizonica</i> Greene,<br>B.S. 393 | Cedro | Spleen pain | Leaves and<br>wood pieces | Boiled, together<br>with canela,<br>ingestion of<br>infusion |
| <i>Juniperus deppeana</i> Steud.               | Cedro | Vomit       | Young branches            | Boiled,<br>ingestion of                                      |

infusion

EQUISETACEAE

*Equisetum hyemale* L. var. Cola de Kidney Stems Boiled together  
*affine* A. A. Eaton, B.S. 391 caballo stones with *Zea mays*  
styles and  
*Eysenhardtia*  
*texana* wood  
pieces, ingestion  
of infusion

Cancer Stems Boiled,  
prevention ingestion of  
infusion

ERICACEAE

*Arbutus xalapensis* Sarg., Madroño Diabetes Leaves Boiled,  
B.S. 474 ingestion of  
infusion  
Headache Gum Anoint on the  
temples  
*Arctostaphylos pungens* Manzanita or Kidney Leaves Boiled, together  
Kunth, B.S. 392 pingüica stones with *Equisetum*  
*hyemale* stems  
and *Zea mays*  
styles, ingestion  
of infusion

EUPHORBIACEAE

|                                               |                      |                        |                     |                                                                                                                            |
|-----------------------------------------------|----------------------|------------------------|---------------------|----------------------------------------------------------------------------------------------------------------------------|
| <i>Acalypha monostachya</i> Cav.,<br>B.S. 476 | Hierba del<br>cancer | Cancer<br>prevention   | Leaves and<br>stems | Boiled,<br>ingestion of<br>infusion                                                                                        |
|                                               |                      | Wounds and<br>hematoma | Leaves and<br>stems | Wash the<br>wounded area;<br>place the wound<br>area over the<br>steam produced<br>by leaves and<br>stems while<br>boiling |
| <i>Croton suaveolens</i> Torr.,<br>B.S. 475   | Salvia               | Anemia                 | Stem pieces         | Boiled,<br>ingestion of<br>infusion                                                                                        |
|                                               |                      | Diabetes               | Stem pieces         | Boiled,<br>ingestion of<br>infusion                                                                                        |
|                                               |                      | Low pressure           | Leaves              | Boiled, together<br>with <i>Carya</i><br><i>illinoensis</i> bark,<br>ingestion of<br>infusion                              |
|                                               |                      | Headache               | Stem pieces         | Boiled, together<br>with <i>Carya</i>                                                                                      |

|                                                         |                         |                      |             |                                                                                                                                    |
|---------------------------------------------------------|-------------------------|----------------------|-------------|------------------------------------------------------------------------------------------------------------------------------------|
|                                                         |                         |                      |             | <i>illinoensis</i> bark,<br>ingestion of<br>infusion                                                                               |
|                                                         |                         | Fatigue              | Leaves      | Boiled,<br>ingestion of<br>infusion                                                                                                |
|                                                         |                         | Amoeba               | Leaves      | Boiled, drink as<br>the first drink of<br>the day, and<br>before the first<br>meal of the day                                      |
| <i>Euphorbia antisyphilitica</i> J.<br>Meyrán, B.S. 478 | Candelilla              | Swollen feet         | Root        | Boiled, soak a<br>towel and cover<br>the foot                                                                                      |
| <i>Euphorbia glyptosperma</i><br>Engelm., B.S. 477      | Hierba de la<br>hormiga | Bladder<br>infection | Whole plant | Boiled,<br>ingestion of<br>infusion                                                                                                |
|                                                         |                         | Kidney<br>infection  | Root        | Boiled, together<br>with <i>Zae mays</i><br>styles and<br><i>Equisetum</i><br><i>laevigatum</i><br>stems, ingestion<br>of infusion |
| <i>Jatropha dioica</i> Sessé, B.S.                      | Sangre de               | Warts                | Gum         | Applied directly                                                                                                                   |

|     |       |             |             |                                                       |
|-----|-------|-------------|-------------|-------------------------------------------------------|
| 356 | drago |             |             | over the wart                                         |
|     |       | Foot fungus | Root pieces | Boiled,<br>introduce the<br>feet into the<br>solution |

|                                         |                             |                       |             |                                     |
|-----------------------------------------|-----------------------------|-----------------------|-------------|-------------------------------------|
| <i>Tragia ramosa</i> Torr., B.S.<br>457 | Ortiguilla or<br>mala mujer | General pain          | Leaves      | Boiled,<br>ingestion of<br>infusion |
|                                         |                             | Blood<br>purification | Leaves      | Boiled,<br>ingestion of<br>infusion |
|                                         |                             | Bronchitis            | Leaves      | Boiled,<br>ingestion of<br>infusion |
|                                         |                             | Evil spells           | Whole plant | Boiled,<br>ingestion of<br>infusion |
|                                         |                             | Itch                  | Leaves      | Boiled,<br>ingestion of<br>infusion |

FAGACEAE

|                                                     |        |             |       |                                                   |
|-----------------------------------------------------|--------|-------------|-------|---------------------------------------------------|
| <i>Quercus mexicana</i> Humb. &<br>Bonpl., B.S. 459 | Encino | Loose teeth | Bark  | Milled, mixed<br>with tooth paste,<br>brush teeth |
| <i>Quercus polymorpha</i>                           | Encino | Cough       | Fruit | Boiled,                                           |

Schltdl. & Cham., B.S. 460

ingestion of

infusion

Healthy teeth

Bark

Boiled, milled,

mouthwash

#### GERANIACEAE

*Erodium cicutarium* (L.)

Alfilerillo

Sore throat

Whole plant

Boiled, gargle

L'Hér., B.S. 461

*Pelargonium hortorum* L. H.

Geranio

Gingival

Leaves

Cataplasm,

Bailey, B.S. 458

inflammation

smeared with

vegetable fat

Wounds

Flowers and

Milled, applied

leaves

as cataplasm

Toothache

Leaves

Chewing leaves

Stomach

Leaves

Boiled,

ache

ingestion of

infusion

Headache

Leaves

Stick leaves

with vick-

vaporub in both

temples

Constipation

Part of petiole

Introduce it into

(babies)

(oiled)

the anus

Tachycardia

Flowers

Boiled,

ingestion of

infusion

Hemorrhages    Flowers    Milled, applied  
as cataplasm in  
affected area

Abortive    Leaves    Boiled,  
ingestion of  
infusion

JUGLANDACEAE

*Carya illinoensis*    Nogal  
(Wangenh.) K. Koch, B.S.

424

Hemorrhages    Fruit peel    Boiled, together  
with *Punica*  
*granatum* fruit  
peel, ingestion  
of infusion

Diabetes    Bark    Boiled,  
ingestion of  
infusion

Anemia    Bark and fruit  
peel together    Boiled,  
ingestion of  
infusion

Blood  
purification    Leaves    Boiled,  
ingestion of  
infusion

Cholesterol    Halves nut    Eaten raw

Hair loss    Fruit peel    Add to shampoo

Stomach  
inflammation    Halves nut    Blend with  
water, peanut

and oatmeal

|                                                           |                |        |        |                               |
|-----------------------------------------------------------|----------------|--------|--------|-------------------------------|
| <i>Carya myristiciformis</i> (F. Michx.) Elliot, B.S. 479 | Nogal cimarrón | Anemia | Leaves | Boiled, ingestion of infusion |
|-----------------------------------------------------------|----------------|--------|--------|-------------------------------|

LAMIACEAE

|                                            |                 |               |                  |                               |
|--------------------------------------------|-----------------|---------------|------------------|-------------------------------|
| <i>Hedeoma drummondii</i> Benth., B.S. 423 | Poleo or regote | Sleeplessness | Leaves and stems | Boiled, ingestion of infusion |
|                                            |                 | Nervousness   | Leaves           | Boiled, ingestion of infusion |
|                                            |                 | Headache      | Leaves           | Place leaves on the temples   |
|                                            |                 | Chills        | Leaves           | Crude milled leaves, inhale   |
|                                            |                 | Cough         | Leaves and stems | Boiled, ingestion of infusion |

|                                         |                     |                         |            |                               |
|-----------------------------------------|---------------------|-------------------------|------------|-------------------------------|
| <i>Hedeoma palmeri</i> Hemsl., B.S. 480 | Poleo de hoja ancha | Nervousness             | Leaves     | Boiled, ingestion of infusion |
|                                         |                     | Inflammation postpartum | Leaves     | Boiled, ingestion of infusion |
|                                         |                     | Diabetes                | Leaves and | Boiled,                       |

|                                               |                              |                     |                                     |
|-----------------------------------------------|------------------------------|---------------------|-------------------------------------|
|                                               |                              | stems               | ingestion of<br>infusion            |
|                                               | Stomach<br>inflammation      | Leaves and<br>stems | Boiled,<br>ingestion of<br>infusion |
|                                               | Infertility                  | Flowers             | Boiled,<br>ingestion of<br>infusion |
|                                               | Menstrual<br>colic           | Flowers             | Boiled,<br>ingestion of<br>infusion |
|                                               | Insomnia                     | Leaves              | Boiled,<br>ingestion of<br>infusion |
| <i>Majorana hortensis</i> Moench,<br>B.S. 462 | Mejorana<br>General<br>aches | Leaves              | Boiled,<br>ingestion of<br>infusion |
|                                               | High<br>temperature          | Leaves              | Boiled,<br>ingestion of<br>infusion |
|                                               | Stomach<br>ache              | Leaves              | Boiled,<br>ingestion of<br>infusion |
|                                               | Menstrual<br>colic           | Leaves              | Boiled together<br>with             |

|                                          |          |                         |                     |                                                                                    |
|------------------------------------------|----------|-------------------------|---------------------|------------------------------------------------------------------------------------|
|                                          |          |                         |                     | <i>Chenopodium<br/>ambrosiodes,</i><br>ingestion of<br>infusion                    |
| <i>Marrubium vulgare</i> L., B.S.<br>425 | Marrubio | Hair loss<br>prevention | Leaves and<br>stems | Boiled and<br>applied after<br>shampoo                                             |
|                                          |          | Fungus foot             | Leaves              | Boiled, rinse<br>foot on it                                                        |
|                                          |          | Stomach<br>ache         | Leaves              | Boiled,<br>ingestion of<br>infusion                                                |
|                                          |          | Diarrhea                | Leaves and<br>stems | Boiled,<br>ingestion of<br>infusion                                                |
|                                          |          | Indigestion             | Leaves              | Boiled,<br>ingestion of<br>infusion                                                |
|                                          |          | Hepatitis               | Leaves and<br>stems | Scrub the whole<br>dry plant over<br>the body and<br>also ingestion of<br>infusion |
|                                          |          | Tinnitus                | Apical meristem     | Meristem into<br>cotton roll and                                                   |

|                      |                     |                                                                   |
|----------------------|---------------------|-------------------------------------------------------------------|
|                      |                     | place it inside<br>the ear                                        |
| Fright               | Leaves and<br>stems | Scrub the whole<br>dry plant over<br>the body                     |
| Weight loss          | Leaves              | Boiled, the first<br>drink of the day<br>before first meal        |
| Spleen               | Apical meristem     | Boiled,<br>ingestion of<br>infusion                               |
| Bad breath           | Leaves              | Boiled,<br>mouthwash<br>three times at<br>day                     |
| Wounds and<br>grains | Leaves              | Milled, applied<br>as cataplasm                                   |
| Grinder ache         | Leaves              | Milled, applied<br>as cataplasm,<br>place in the<br>affected area |
| Smelly feet          | Leaves              | Place a bunch of<br>leaves inside the<br>shoes                    |

*Melissa officinalis* L., B.S.

Toronjil

Tachycardia

Leaves

Boiled,

|                                     |                                  |                     |        |                                                                                                          |
|-------------------------------------|----------------------------------|---------------------|--------|----------------------------------------------------------------------------------------------------------|
|                                     |                                  |                     |        | ingestion of<br>infusion                                                                                 |
|                                     |                                  | Chest pain          | Leaves | Boiled, together<br>with <i>Ocimum<br/>basilicum</i><br>leaves, ingestion<br>of infusion                 |
|                                     |                                  | Calmative           | Leaves | Boiled,<br>ingestion of<br>infusion                                                                      |
| <i>Mentha piperita</i> L., B.S. 427 | Yerbabuena<br>or hierba<br>buena | Stomach<br>ache     | Leaves | Boiled,<br>ingestion of<br>infusion                                                                      |
|                                     |                                  | Colic               | Leaves | Boiled,<br>ingestion of<br>infusion                                                                      |
|                                     |                                  | Amoeba<br>(babies)  | Leaves | Boiled,<br>ingestion of<br>infusion                                                                      |
|                                     |                                  | High<br>temperature | Leaves | Boiled, together<br>with <i>Borago<br/>officinalis</i> leaves<br>and canela,<br>ingestion of<br>infusion |

|                      |        |                                                                                                        |
|----------------------|--------|--------------------------------------------------------------------------------------------------------|
| Flu                  | Leaves | Boiled, together with <i>Citrus limon</i> and <i>Borago officinalis</i> leaves, ingestion of infusion  |
| Cold                 | Leaves | Boiled, together with <i>Matricaria recutita</i> leaves and canela, ingestion of infusion              |
| Headache             | Leaves | Boiled, ingestion of infusion                                                                          |
| Intestinal parasites | Leaves | Boiled, the first drink of the day before first meal                                                   |
| External wounds      | Leaves | Boiled, together with <i>Trixis californica</i> var. <i>californica</i> leaves, milled, applied in the |

|                                               |           |                 |                     |                                                                                                       |
|-----------------------------------------------|-----------|-----------------|---------------------|-------------------------------------------------------------------------------------------------------|
|                                               |           |                 |                     | affected area                                                                                         |
|                                               |           | Indigestion     | Leaves              | Toasted,<br>together with<br><i>Flourensia</i><br><i>cernua</i> leaves<br>and oil, take a<br>spoonful |
|                                               |           | Calmative       | Leaves              | Boiled,<br>ingestion of<br>infusion                                                                   |
|                                               |           | Vomit           | Leaves              | Boiled,<br>ingestion of<br>infusion                                                                   |
|                                               |           | Diarrhea        | Leaves              | Boiled,<br>ingestion of<br>infusion                                                                   |
| <i>Mentha spicata</i> L., B.S. 368            | Menta     | Gastritis       | Leaves and<br>stems | Boiled,<br>ingestion of<br>infusion                                                                   |
|                                               |           | Insomina        | Leaves and<br>stems | Boiled,<br>ingestion of<br>infusion                                                                   |
| <i>Mentha rotundifolia</i> Huds.,<br>B.S. 367 | Mastranto | Stomach<br>ache | Leaves and<br>stems | Boiled,<br>ingestion of<br>infusion                                                                   |

|                                                                                                 |                      |                         |                          |                                               |
|-------------------------------------------------------------------------------------------------|----------------------|-------------------------|--------------------------|-----------------------------------------------|
|                                                                                                 |                      | Indigestion<br>(babies) | Leaves and<br>stems      | Boiled,<br>ingestion of<br>infusion           |
| <i>Monarda citriodora</i> Cerv.<br>var. <i>austromontana</i> (Epling)<br>B. L. Turner, B.S. 384 | Betónica<br>cabezona | Diabetes                | Leaves                   | Boiled,<br>ingestion of<br>infusion           |
|                                                                                                 |                      | Menstrual<br>delay      | Leaves                   | Boiled,<br>ingestion of<br>infusion           |
| <i>Ocimum basilicum</i> L., B.S.<br>328                                                         | Albahaca             | Earache                 | Leaves                   | Mixed with<br>olive oil, anoint<br>it         |
|                                                                                                 |                      | Envy                    | Whole plant              | Scrub the whole<br>dry plant over<br>the body |
|                                                                                                 |                      | Nightmares              | Whole plant              | Place it at the<br>bedside                    |
|                                                                                                 |                      | Chest pain              | Whole plant              | Toasted,<br>inhaling vapors                   |
|                                                                                                 |                      | Bronchitis              | Whole plant              | Boiled,<br>ingestion of<br>infusion           |
|                                                                                                 |                      | Vomit                   | Leaves or whole<br>plant | Boiled or<br>macerated<br>crude, ingestion    |

|                                                    |         |                 |             |                                                                                                                                                                                   |
|----------------------------------------------------|---------|-----------------|-------------|-----------------------------------------------------------------------------------------------------------------------------------------------------------------------------------|
|                                                    |         |                 |             | of infusion                                                                                                                                                                       |
|                                                    |         | Fright          | Whole plant | Scrub the whole<br>dry plant over<br>the body; boiled<br>together with<br><i>Citrus sinensis</i><br>leaves, ingestion<br>of infusion in<br>the evenings                           |
|                                                    |         | Tachycardia     | Leaves      | Boiled, together<br>with <i>Melissa</i><br><i>officinalis</i><br>leaves, ingestion<br>of infusion                                                                                 |
|                                                    |         | Stomach<br>ache | Leaves      | Boiled,<br>ingestion of<br>infusion                                                                                                                                               |
| <i>Poliomintha longiflora</i> A.<br>Gray, B.S. 329 | Orégano | Cough           | Leaves      | Boiled, together<br>with <i>Eucalyptus</i><br><i>camaldulensis</i> ,<br><i>Gnaphalium</i><br><i>canescens</i> and<br><i>Cordia boissieri</i><br>leaves, ingestion<br>of infusion; |

|                                               |        |                 |             |                                                                                                                                  |
|-----------------------------------------------|--------|-----------------|-------------|----------------------------------------------------------------------------------------------------------------------------------|
|                                               |        |                 |             | toasted and<br>milled, mixed<br>with fat, spreads<br>on throat and<br>feet                                                       |
|                                               |        | Bronchitis      | Leaves      | Ingestion of<br>infusion                                                                                                         |
| <i>Rosmarinus officinalis</i> L.,<br>B.S. 385 | Romero | Stained face    | Whole plant | Clean the face<br>with the infusion                                                                                              |
|                                               |        | Insomnia        | Leaves      | Boiled,<br>ingestion of<br>infusion                                                                                              |
|                                               |        | Stomach<br>ache | Leaves      | Boiled,<br>ingestion of<br>infusion;<br>together with<br><i>Mentha piperita</i><br>leaves, ingestion<br>of infusion              |
|                                               |        | High fever      | Leaves      | Boiled, together<br>with <i>Majorana</i><br><i>hortensis</i> and<br><i>Commelina</i><br><i>dianthifolia</i><br>leaves, ingestion |

|                  |             |                                                                                                                                                |
|------------------|-------------|------------------------------------------------------------------------------------------------------------------------------------------------|
|                  |             | of infusion                                                                                                                                    |
| Hair loss        | Whole plant | Boiled, use as shampoo                                                                                                                         |
| Leg pain         | Leaves      | Boiled, rub with the infusion                                                                                                                  |
| Fright           | Whole plant | Scrub the whole dry plant over the body; boiled, together with <i>Leucophyllum frutescens</i> leaves, ingest and take a bath with the infusion |
| Grey hair        | Stem pieces | Embedded in alcohol, until turns green, applied in the hair                                                                                    |
| Ward off witches | Whole plant | Nail a branch on the wall                                                                                                                      |
| Gallblader       | Whole plant | Boiled, together with <i>Achillaea millefolium</i> and canela, ingestion                                                                       |

|                                              |         |                        |                     |                                                                  |
|----------------------------------------------|---------|------------------------|---------------------|------------------------------------------------------------------|
|                                              |         |                        |                     | of infusion                                                      |
| <i>Salvia chia</i> Sessé & Moc.,<br>B.S. 426 | Chia    | Stomach<br>ache        | Stems and<br>leaves | Boiled,<br>ingestion of<br>infusion                              |
| <i>Teucrium cubense</i> L., B.S.<br>448      | Verbena | Blows                  | Leaves              | Crude, as<br>cataplasm mixed<br>with egg white                   |
|                                              |         | Kidney<br>stones       | Leaves and<br>stems | Boiled,<br>ingestion of<br>infusion                              |
|                                              |         | High<br>temperature    | Leaves              | Boiled,<br>ingestion of<br>infusion,<br>liquefied take a<br>bath |
|                                              |         | Fright                 | Leaves and<br>stems | Scrub the whole<br>dry plant over<br>the body                    |
|                                              |         | Stimulate<br>apetite   | Leaves              | Boiled,<br>ingestion of<br>infusion                              |
| <i>Thymus vulgaris</i> L., B.S. 453          | Tomillo | Diabetes<br>prevention | Leaves              | Boiled,<br>ingestion of<br>infusion                              |

#### LAURACEAE

|                                                                                                    |          |            |                |                                                                                                                                                                      |
|----------------------------------------------------------------------------------------------------|----------|------------|----------------|----------------------------------------------------------------------------------------------------------------------------------------------------------------------|
| <i>Litsea glaucescens</i> Kunth,<br>B.S. 463                                                       | Laurel   | Spleen     | Leaves         | Boiled,<br>ingestion of<br>infusion                                                                                                                                  |
|                                                                                                    |          | Chest pain | Leaves         | Boiled,<br>ingestion of<br>infusion                                                                                                                                  |
| <i>Litsea pringlei</i> Bartlett, B.S.<br>447                                                       | Laurel   | Spleen     | Leaves         | Boiled,<br>ingestion of<br>infusion                                                                                                                                  |
|                                                                                                    |          | Headache   | Leaves         | Boiled,<br>ingestion of<br>infusion                                                                                                                                  |
| <i>Persea americana</i> Mill. ssp.<br><i>drymifolia</i> (Schtdl. &<br>Cham.) S. F. Blake, B.S. 428 | Aguacate | Kidney     | Seed           | Boiled, together<br>with <i>Equisetum</i><br><i>hyemale</i> , <i>Zea</i><br><i>mayz</i> and<br><i>Teucrium</i><br><i>cubense</i> leaves,<br>ingestion of<br>infusion |
|                                                                                                    |          | Amoebas    | Leaves or seed | Boiled,<br>ingestion of<br>infusion                                                                                                                                  |
|                                                                                                    |          | Diarrhea   | Leaves         | Boiled,<br>ingestion of                                                                                                                                              |

|                    |                 |  |  |                                     |
|--------------------|-----------------|--|--|-------------------------------------|
|                    |                 |  |  | infusion                            |
| Gastritis          | Leaves          |  |  | Boiled,<br>ingestion of<br>infusion |
| Hair growth        | Seed and bark   |  |  | Boiled, applied<br>after shampoo    |
| Anemia             | Leaves          |  |  | Boiled,<br>ingestion of<br>infusion |
| High<br>pressure   | Leaves and seed |  |  | Boiled,<br>ingestion of<br>infusion |
| Cysts in<br>matrix | Leaves          |  |  | Boiled,<br>ingestion of<br>infusion |

#### LEGUMINOSAE

|                                                   |                                 |                      |                     |                                                                                                                  |
|---------------------------------------------------|---------------------------------|----------------------|---------------------|------------------------------------------------------------------------------------------------------------------|
| <i>Acacia amentacea</i> DC., B.S.<br>429          | Chaparro<br>prieto or<br>gavial | Cancer<br>prevention | Leaves and<br>stems | Boiled,<br>ingestion of<br>infusion                                                                              |
| <i>Acacia farnesiana</i> (L.)<br>Willd., B.S. 332 | Huizache                        | Kidney               | Root and bark       | Root boiled,<br>together with<br><i>Opuntia</i><br><i>engelmannii</i> var.<br><i>cuija</i> root,<br>ingestion of |

|                                                       |            |                  |                |                                                                                                                                                                                                       |
|-------------------------------------------------------|------------|------------------|----------------|-------------------------------------------------------------------------------------------------------------------------------------------------------------------------------------------------------|
|                                                       |            |                  |                | infusion; bark<br>boiled, together<br>with <i>Prunus<br/>serotina</i> leaves,<br>ingest in the<br>morning and in<br>the night                                                                         |
|                                                       |            | Diarrhea         | Stems          | Boiled, together<br>with <i>Celtis<br/>pallida</i> ,<br><i>Buddleja<br/>scordioides</i> ,<br><i>Chrysactinia<br/>mexicana</i> and<br><i>Lippia<br/>graveolens</i><br>leaves, ingestion<br>of infusion |
| <i>Eysenhardtia parvifolia</i><br>Brandegee, B.S. 330 | Vara dulce | Kidney<br>stones | Stems          | Boiled,<br>ingestion of<br>infusion                                                                                                                                                                   |
| <i>Eysenhardtia texana</i><br>Scheele, B.S. 331       | Vara dulce | Kidney<br>stones | Stems and bark | Soak in water by<br>one night,<br>ingestion of<br>solution                                                                                                                                            |

|                                                                                             |               |                        |                  |                                                                    |
|---------------------------------------------------------------------------------------------|---------------|------------------------|------------------|--------------------------------------------------------------------|
|                                                                                             |               | Allergy                | Stems            | Boiled, take a bath with infusion                                  |
|                                                                                             |               | Bladder infection      | Bark             | Soak in water by one night, ingestion of solution                  |
| <i>Mimosa malacophylla</i> A. Gray, B.S. 454                                                | Charrasquilla | Kidney stones          | Leaves and stems | Boiled, ingestion of infusion                                      |
| <i>Phaseolus vulgaris</i> L., B.S. 464                                                      | Frijol        | Diabetes               | Seed             | Cook, ingest                                                       |
| <i>Prosopis glandulosa</i> Torr. var. <i>torreyana</i> (L. Benson) M. C. Johnston, B.S. 446 | Mezquite      | Sore waist             | Root             | Macerated, together with <i>Opuntia</i> root, applied as cataplasm |
|                                                                                             |               | Incontinence (infants) | Resin (gum)      | Smear in the navel                                                 |
|                                                                                             |               | Alcoholism             | Root             | Boiled, ingestion of infusion (prevent relapse of alcoholism)      |
|                                                                                             |               | Diarrhea               | Leaves           | Macerated,                                                         |

|                               |        |                                                                                                                                                                                                                                                                                                    |
|-------------------------------|--------|----------------------------------------------------------------------------------------------------------------------------------------------------------------------------------------------------------------------------------------------------------------------------------------------------|
|                               |        | place in water<br>for one or several<br>days, ingestion<br>of infusion                                                                                                                                                                                                                             |
| Broken<br>bones,<br>fractures | Bark   | Macerated,<br>together with<br><i>Echinocereus<br/>poselgeri</i> root<br>pulp, band the<br>affected part,<br>place the pulp<br>over the band<br>(not directly, the<br>pulp is irritant to<br>the skin if placed<br>directly) and<br>band again, tighten<br>the bands,<br>avoiding bone<br>movement |
| Stomach<br>ache               | Leaves | Boiled, together<br>with <i>Matricaria<br/>recutita</i> leaves<br>and <i>Buddleja<br/>scordioides</i> root,                                                                                                                                                                                        |

|                                                                           |                    |              |             |                                                      |
|---------------------------------------------------------------------------|--------------------|--------------|-------------|------------------------------------------------------|
|                                                                           |                    |              |             | ingestion of<br>infusion                             |
|                                                                           |                    | Indigestion  | Wood hashes | Mixed with<br>honey bee and<br>ingest a spoon        |
| <i>Senna crotalarioides</i><br>(Kunth) H. S. Irwin &<br>Barneby, B.S. 333 | Yerba del<br>potro | Headache     | Leaves      | Boiled,<br>ingestion of<br>infusion                  |
|                                                                           |                    | Sore throat  | Leaves      | Milled, applied<br>as cataplasm out<br>of the throat |
|                                                                           |                    | Colic        | Leaves      | Boiled,<br>ingestion of<br>infusion                  |
|                                                                           |                    | Inflammation | Leaves      | Boiled,<br>ingestion of<br>infusion                  |

#### LILIACEAE

|                                    |     |       |              |                                                                                                                                                 |
|------------------------------------|-----|-------|--------------|-------------------------------------------------------------------------------------------------------------------------------------------------|
| <i>Allium sativum</i> L., B.S. 445 | Ajo | Cough | Garlic clove | Mixed with<br><i>Citrus limon</i> ;<br><i>Allium cepa</i> ,<br><i>Citrus limon</i><br>juice and honey<br>bee, ingestion of<br>solution; boiled, |
|------------------------------------|-----|-------|--------------|-------------------------------------------------------------------------------------------------------------------------------------------------|

|                                  |          |                  |                                                                           |                                                                                           |
|----------------------------------|----------|------------------|---------------------------------------------------------------------------|-------------------------------------------------------------------------------------------|
|                                  |          |                  | together with<br>canela, <i>Citrus<br/>limon</i> and honey<br>bee, ingest |                                                                                           |
|                                  |          | Expectorant      | Garlic clove                                                              | Crude, liquefied,<br>the first drink of<br>the day before<br>first meal; toast<br>and eat |
|                                  |          | Constipation     | Garlic clove                                                              | Boiled,<br>ingestion of<br>infusion                                                       |
|                                  |          | Spider bite      | Garlic clove                                                              | Crude, milled,<br>applied as<br>cataplasm in the<br>affected area                         |
|                                  |          | High<br>pressure | Garlic clove                                                              | Boiled,<br>ingestion of<br>infusion                                                       |
|                                  |          | High fever       | Garlic clove                                                              | Boiled,<br>ingestion of<br>infusion                                                       |
|                                  |          | Diabetes         | Garlic clove                                                              | Ingest crude                                                                              |
|                                  |          | Typhoid          | Garlic clove                                                              | Ingest crude                                                                              |
| <i>Asphodelus fistulosus</i> L., | Cebollín | Stained face     | Stems                                                                     | Macerated,                                                                                |

B.S. 334

applied as  
cataplasm, clean  
the face

LORANTHACEAE

*Phoradendron villosum*  
(Nutt.) Nutt. ex Engelm.,  
B.S. 430

Injerto

Cancer  
prevention

Leaves

Boiled,  
ingestion of  
infusion

Kidney  
stones

Leaves and  
stems

Boiled,  
ingestion of  
infusion

Diabetes

Leaves and  
stems

Boiled,  
ingestion of  
infusion, ingest  
in the morning  
and in the night

Grinder ache

Leaves

Chewing leaves

Urinary  
problems  
(horses)

Leaves and  
stems

Place leaves and  
stems together  
with four liters  
of water, boil it  
until vaporize  
half of the  
content, give it  
to drink the  
horse

|        |        |                                     |
|--------|--------|-------------------------------------|
| Anemia | Leaves | Boiled,<br>ingestion of<br>infusion |
|--------|--------|-------------------------------------|

LYTHRACEAE

|                                                    |      |                   |        |                                                                                                     |
|----------------------------------------------------|------|-------------------|--------|-----------------------------------------------------------------------------------------------------|
| <i>Heimia salicifolia</i> Link &<br>Otto, B.S. 431 | Jara | Eye<br>infections | Leaves | Boiled, together<br>with <i>Fraxinus</i><br><i>cuspidata</i> ,<br>infusion applied<br>into the eyes |
|----------------------------------------------------|------|-------------------|--------|-----------------------------------------------------------------------------------------------------|

MALVACEAE

|                                         |       |                    |        |                                                                  |
|-----------------------------------------|-------|--------------------|--------|------------------------------------------------------------------|
| <i>Malva parviflora</i> L., B.S.<br>335 | Malva | Abscesses          | Leaves | Macerated<br>crude, applied as<br>cataplasm                      |
|                                         |       | Varicose<br>ulcers | Leaves | Macerated<br>crude, applied as<br>cataplasm                      |
|                                         |       | Grinder ache       | Leaves | Chewing leaves                                                   |
|                                         |       | Burns              | Leaves | Macerated<br>crude, applied as<br>cataplasm<br>together with oil |
|                                         |       | Blows              | Leaves | Macerated<br>crude, applied as<br>cataplasm                      |
|                                         |       | Swollen feet       | Leaves | Macerated                                                        |

|                     |                     |                                                                               |
|---------------------|---------------------|-------------------------------------------------------------------------------|
|                     |                     | crude, applied as<br>cataplasm                                                |
| Wounds              | Leaves              | Boiled, wash<br>affected part<br>with the infusion                            |
| Grains              | Leaves              | Macerated<br>crude, applied as<br>cataplasm                                   |
| High<br>temperature | Leaves and<br>stems | Boiled in two<br>liters of water,<br>with the infusion<br>take a bath         |
| Sore hands          | Leaves              | Boiled, with the<br>infusion wash<br>the hands                                |
| Nervousness         | Leaves              | Boiled, together<br>with <i>Plantago<br/>major</i> , ingestion<br>of infusion |
| Stomach<br>ache     | Leaves              | Boiled,<br>ingestion of<br>infusion                                           |
| Tinnitus            | Leaves              | Crude, stick<br>leaves with fat<br>on the ear                                 |

|           |        |                              |
|-----------|--------|------------------------------|
| Throat    | Leaves | Boiled, infusion             |
| infection |        | applied out of<br>the throat |

MORACEAE

|                                  |      |           |                          |                                             |
|----------------------------------|------|-----------|--------------------------|---------------------------------------------|
| <i>Ficus carica</i> L., B.S. 336 | Higo | Nosebleed | Leaves                   | Toasted,<br>inhaling the<br>smoke           |
|                                  |      | Wounds    | Fruit                    | Pulp, applied<br>directly over the<br>wound |
|                                  |      | Pustule   | Fruit pulp<br>or/and sap | Applied directly<br>to the wound            |

|                                              |      |       |                     |                                 |
|----------------------------------------------|------|-------|---------------------|---------------------------------|
| <i>Morus celtidifolia</i> Kunth,<br>B.S. 455 | Mora | Blows | Leaves and<br>stems | Milled, applied<br>as cataplasm |
|----------------------------------------------|------|-------|---------------------|---------------------------------|

MYRTACEAE

|                                                     |           |                  |        |                                                                                                       |
|-----------------------------------------------------|-----------|------------------|--------|-------------------------------------------------------------------------------------------------------|
| <i>Eucalyptus camaldulensis</i><br>Dehnh., B.S. 337 | Eucalipto | Cough            | Leaves | Boiled, together<br>with<br><i>Gnaphalium</i><br><i>canescens</i><br>leaves, ingestion<br>of infusion |
|                                                     |           | Tired<br>muscles | Leaves | Milled, together<br>with glycerin,<br><i>Ruta graveolens</i><br>leaves, onion                         |

and garlic  
pieces, alcanfor  
and alcohol, rub  
the muscles

*Psidium guajava* L., B.S.  
444

Guayaba

Diarrhea

Fruit

Eat crude

High  
pressure

Fruit

Liquefied, drink

#### NYCTAGINACEAE

*Bougainvillea glabra*  
Choisy, B.S. 456

Bugambilia

Cough

Bracts and  
flowers

Boiled, together  
with *Eucalyptus*  
*camaldulensis*  
and *Gnaphalium*  
*canescens*  
leaves, ingestion  
of infusion

#### OLEACEAE

*Fraxinus cuspidata* Torr.,  
B.S. 465

Fresno

Back pain

Branches

Lying on them  
for four  
consecutive  
nights

*Olea europea* L., B.S., 443

Olivo

Improve  
blood  
circulation  
and

Leaves

Boiled,  
ingestion of  
infusion

cholesterol

ONAGRACEAE

|                                        |                  |                        |        |                                            |
|----------------------------------------|------------------|------------------------|--------|--------------------------------------------|
| <i>Oenothera rosea</i> Aiton, B.S. 338 | Hierba del golpe | Blows, external wounds | Leaves | Milled, mixed with fat, apply as cataplasm |
|----------------------------------------|------------------|------------------------|--------|--------------------------------------------|

PINACEAE

|                                         |          |                        |                |                                                                                                                       |
|-----------------------------------------|----------|------------------------|----------------|-----------------------------------------------------------------------------------------------------------------------|
| <i>Pinus cembroides</i> Zucc., B.S. 432 | Piñonero | Rheumatism             | Resin          | Melted, applied as cream                                                                                              |
|                                         |          | Broken bones (animals) | Resin          | Fractured leg is “plastered” with resin, together with <i>Opuntia imbricata</i> stem pulp, and covered with a bandage |
|                                         |          | Bronchitis             | Young branches | Boiled, together with brown sugar, ingestion of infusion                                                              |
|                                         |          | Leg pain               | Resin          | Melted, together with alcohol, applied as cataplasm                                                                   |
|                                         |          | Back injuries          | Resin          | Melted, applied                                                                                                       |

|                                      |             |           |      |                        |
|--------------------------------------|-------------|-----------|------|------------------------|
|                                      |             | (donkeys) |      | to the wound           |
| <i>Pinus pseudostrobus</i> Lindl.    | Pino blanco | Kidney    | Bark | Boiled and             |
| var. <i>estevezii</i> Martínez, B.S. |             | disorders |      | milled, together       |
| 339                                  |             |           |      | with <i>Prunus</i>     |
|                                      |             |           |      | <i>serotina</i> milled |
|                                      |             |           |      | bark, ingestion        |
|                                      |             |           |      | of infusion            |

PLUMBAGINACEAE

|                                   |           |         |        |                  |
|-----------------------------------|-----------|---------|--------|------------------|
| <i>Plumbago pulchella</i> Boiss., | Júrica or | Swollen | Leaves | Boiled, wash the |
| B.S. 442                          | Júdica    | waist   |        | affected part    |

POACEAE

|                                          |       |             |       |                  |
|------------------------------------------|-------|-------------|-------|------------------|
| <i>Avena fatua</i> L. var. <i>sativa</i> | Avena | Cholesterol | Seeds | Boiled, together |
| Thell., B.S. 441                         |       |             |       | with almonds,    |
|                                          |       |             |       | ingest           |

|  |  |           |       |                |
|--|--|-----------|-------|----------------|
|  |  | Allergies | Seeds | Boiled, take a |
|  |  |           |       | bath           |

|                                    |              |     |        |              |
|------------------------------------|--------------|-----|--------|--------------|
| <i>Cymbopogon citratus</i> Stapf., | Zacate limon | Flu | Leaves | Boiled,      |
| B.S. 340                           |              |     |        | ingestion of |
|                                    |              |     |        | infusion     |

|  |  |             |        |              |
|--|--|-------------|--------|--------------|
|  |  | Nervousness | Leaves | Boiled,      |
|  |  |             |        | ingestion of |
|  |  |             |        | infusion     |

|  |  |            |        |              |
|--|--|------------|--------|--------------|
|  |  | Intestinal | Leaves | Boiled,      |
|  |  | parasites  |        | ingestion of |
|  |  |            |        | infusion     |

|     |                                                    |                                 |                     |                                                                                               |                                                                                                               |
|-----|----------------------------------------------------|---------------------------------|---------------------|-----------------------------------------------------------------------------------------------|---------------------------------------------------------------------------------------------------------------|
|     |                                                    |                                 | Inflammation        | Leaves                                                                                        | Boiled, together<br>with nutmeg and<br><i>Croton</i><br><i>suaveolens</i><br>leaves, ingestion<br>of infusion |
| 342 | <i>Phalaris canariensis</i> L., B.S.<br>Alpiste    | High<br>pressure                | Leaves and<br>stems | Boiled, together<br>with <i>Hedeoma</i><br><i>palmeri</i> leaves,<br>ingestion of<br>infusion |                                                                                                               |
|     |                                                    | Improve<br>blood<br>circulation | Leaves and<br>stems | Boiled, soak in<br>two liters of<br>water, ingestion<br>of infusion daily                     |                                                                                                               |
| 341 | <i>Triticum aestivum</i> L., B.S.<br>Trigo         | Cholesterol                     | Seeds               | Liquefied,<br>together with<br>almonds and<br>walnuts, ingest                                 |                                                                                                               |
|     |                                                    | Ingrown<br>toenails             | Seeds               | Chew, applying<br>to the affected<br>part covering<br>with a bandage<br>for few days          |                                                                                                               |
|     | <i>Zea mays</i> L. ssp. <i>Mays</i> , B.S.<br>Maíz | Kidney                          | Styles (female      | Boiled, together                                                                              |                                                                                                               |

|               |                         |                                                                                                                         |
|---------------|-------------------------|-------------------------------------------------------------------------------------------------------------------------|
| disorders     | flowers)                | with <i>Verbena carolina</i> leaves, lemon juice and potato peel, ingestion of infusion                                 |
| Kidney stones | Styles (female flowers) | Boiled, together with <i>Arctostaphylos pungens</i> leaves and <i>Equisetum laevigatum</i> stems, ingestion of infusion |

## PORTULACACEAE

|                                                  |           |              |        |                               |
|--------------------------------------------------|-----------|--------------|--------|-------------------------------|
| <i>Portulaca mundula</i> I. M. Johnst., B.S. 366 | Verdolaga | Indigestion  | Leaves | Boiled, ingestion of infusion |
|                                                  |           | Constipation | Leaves | Boiled, ingestion of infusion |
|                                                  |           | Uric acid    | Leaves | Boiled, ingestion of infusion |

## PUNICACEAE

|                                        |         |            |       |                                     |
|----------------------------------------|---------|------------|-------|-------------------------------------|
| <i>Punica granatum</i> L., B.S.<br>343 | Granada | Hemorrhage | Fruit | Boiled,<br>ingestion of<br>infusion |
|----------------------------------------|---------|------------|-------|-------------------------------------|

|  |  |              |            |                         |
|--|--|--------------|------------|-------------------------|
|  |  | Broken tooth | Fruit peel | Boiled, as<br>mouthwash |
|--|--|--------------|------------|-------------------------|

RANUNCULACEAE

|                                                         |                   |             |             |                             |
|---------------------------------------------------------|-------------------|-------------|-------------|-----------------------------|
| <i>Clematis drummondii</i> Torr.<br>& A. Gray, B.S. 434 | Barba de<br>chivo | Expectorant | Whole plant | Macerated and<br>inhalation |
|---------------------------------------------------------|-------------------|-------------|-------------|-----------------------------|

|  |  |                   |             |                        |
|--|--|-------------------|-------------|------------------------|
|  |  | Skin<br>infection | Whole plant | Boiled, take a<br>bath |
|--|--|-------------------|-------------|------------------------|

RHAMNACEAE

|                                                   |                           |                        |        |                                     |
|---------------------------------------------------|---------------------------|------------------------|--------|-------------------------------------|
| <i>Karwinskia humboldtiana</i><br>Zucc., B.S. 440 | Coyotillo or<br>tullidora | Brucellosis<br>(goats) | Leaves | Boiled,<br>ingestion of<br>infusion |
|---------------------------------------------------|---------------------------|------------------------|--------|-------------------------------------|

ROSACEAE

|                                                                                 |          |                     |      |                                                   |
|---------------------------------------------------------------------------------|----------|---------------------|------|---------------------------------------------------|
| <i>Crataegus tracyi</i> Ashe var.<br><i>madrensis</i> J. B. Phipps, B.S.<br>344 | Tejocote | Kidney<br>disorders | Root | Macerated and<br>boiled, ingestion<br>of infusion |
|---------------------------------------------------------------------------------|----------|---------------------|------|---------------------------------------------------|

|  |  |       |      |                                                   |
|--|--|-------|------|---------------------------------------------------|
|  |  | Clots | Root | Macerated and<br>boiled, ingestion<br>of infusion |
|--|--|-------|------|---------------------------------------------------|

|  |  |                       |        |                                     |
|--|--|-----------------------|--------|-------------------------------------|
|  |  | Bowel<br>inflammation | Fruits | Boiled,<br>ingestion of<br>infusion |
|--|--|-----------------------|--------|-------------------------------------|

|                                                         |         |                                                |                 |                                                                                                                           |
|---------------------------------------------------------|---------|------------------------------------------------|-----------------|---------------------------------------------------------------------------------------------------------------------------|
|                                                         |         | Weight loss                                    | Fruits          | Boiled,<br>ingestion of<br>infusion                                                                                       |
|                                                         |         | Hemorrhage                                     | Fruits          | Boiled, together<br>with <i>Aloe vera</i><br>and <i>Matricaria</i><br><i>recutita</i> leaves,<br>ingestion of<br>infusion |
|                                                         |         | Anemia                                         | Fruits          | Boiled,<br>ingestion of<br>infusion                                                                                       |
|                                                         |         | Diabetes                                       | Root            | Macerated and<br>boiled, ingestion<br>of infusion                                                                         |
| <i>Eriobotrya japonica</i><br>(Thunb.) Lindl., B.S. 345 | Níspero | High<br>pressure                               | Leaves          | Boiled,<br>ingestion of<br>infusion                                                                                       |
|                                                         |         | Diabetes                                       | Fruits          | Boiled,<br>ingestion of<br>infusion                                                                                       |
| <i>Prunus domestica</i> L., B.S.<br>435                 | Ciruelo | Diarrhea<br>Constipation<br>and<br>indigestion | Fruits<br>Fruit | Eat crude<br>Eat crude                                                                                                    |

|                                                                                           |         |                         |                      |                                                                                                                                                                             |
|-------------------------------------------------------------------------------------------|---------|-------------------------|----------------------|-----------------------------------------------------------------------------------------------------------------------------------------------------------------------------|
| <i>Prunus persica</i> (L.) Batsch,<br>B.S. 346                                            | Durazno | Amoeba                  | Leaves and<br>fruits | Boiled,<br>ingestion of<br>infusion                                                                                                                                         |
|                                                                                           |         | Intestinal<br>parasites | Leaves and root      | Boiled,<br>ingestion of<br>infusion                                                                                                                                         |
| <i>Prunus serotina</i> Ehrh. ssp.<br><i>capuli</i> (Cav. ex Spreng.)<br>McVaugh, B.S. 354 |         | Nervousness             | Leaves               | Boiled,<br>ingestion of<br>infusion                                                                                                                                         |
|                                                                                           |         | Kidney<br>disorder      | Bark                 | Boiled, together<br>with <i>Pinus<br/>pseudostrobus</i><br>milled bark,<br>ingestion of<br>infusion                                                                         |
|                                                                                           |         | Bladder<br>infection    | Bark                 | Boiled, together<br>with <i>Trixis<br/>californica</i> var.<br><i>californicq</i> ,<br><i>Equisetum<br/>laevigatum</i> ,<br><i>Mimosa<br/>biuncifera</i> ,<br><i>Borago</i> |

|                                                         |                                 |                          |                             |                                                                                                   |
|---------------------------------------------------------|---------------------------------|--------------------------|-----------------------------|---------------------------------------------------------------------------------------------------|
|                                                         |                                 |                          |                             | <i>officinalis</i> , and<br><i>Buddleja</i><br><i>cordata</i> leaves,<br>ingestion of<br>infusion |
| <i>Purshia plicata</i> (D. Don)<br>Henrickson, B.S. 353 | Rosa de<br>castilla de<br>monte | Diarrhea                 | Leaves and<br>flowers       | Boiled,<br>ingestion of<br>infusion                                                               |
|                                                         |                                 | High fever               | Leaves and<br>flowers       | Milled, mixed<br>with fat, rub the<br>body                                                        |
|                                                         |                                 | Stomach<br>ache          | Leaves and<br>flowers       | Boiled,<br>ingestion of<br>infusion                                                               |
|                                                         |                                 | Diabetes<br>(prevention) | Leaves and<br>flowers       | Boiled,<br>ingestion of<br>infusion, drink it<br>regularly                                        |
|                                                         |                                 | Constipation             | Leaves and<br>flowers       | Boiled,<br>ingestion of<br>infusion                                                               |
| <i>Rosa gallica</i> L., B.S. 352                        | Rosal                           | High<br>temperature      | Leaves, stems<br>and fruits | Boiled,<br>ingestion of<br>infusion                                                               |
| <i>Rubus flagellaris</i> Willd.,                        | Zarzaparrilla                   | Anemia                   | Leaves and                  | Boiled,                                                                                           |

B.S. 365

stems  
ingestion of  
infusion

Diabetes  
Leaves and  
stems  
Boiled,  
ingestion of  
infusion

Kidney  
disorders  
Leaves and  
stems  
Boiled,  
ingestion of  
infusion

RUTACEAE

*Citrus limon* (L.) Burm.,

Limón

Nervousness  
Leaves

Boiled, together  
with *Citrus*  
*sinensis* leaves,  
ingestion of  
infusion

B.S. 351

Cough and  
asthma  
Fruit juice  
Ten lemons,  
mixed with one  
onion and three  
garlic cloves  
(liquefied),  
ingest it

*Citrus sinensis* Osbeck, B.S.

Naranja

Nervousness  
Leaves; flowers

Boiled, together  
with *Citrus*  
*sinensis* leaves,  
ingestion of  
infusion; boiled,

347

|              |         |                                                                                                                                                                                                                                                      |
|--------------|---------|------------------------------------------------------------------------------------------------------------------------------------------------------------------------------------------------------------------------------------------------------|
|              |         | ingestion of<br>infusion                                                                                                                                                                                                                             |
| Insomnia     | Leaves  | Boiled,<br>ingestion of<br>infusion                                                                                                                                                                                                                  |
| Sore knees   | Leaves  | Boiled,<br>ingestion of<br>infusion                                                                                                                                                                                                                  |
| Uric acid    | Leaves  | Boiled,<br>ingestion of<br>infusion                                                                                                                                                                                                                  |
| Uterus cysts | Flowers | Boiled, together<br>with nutshell,<br>avocadobone<br>pieces,<br><i>Rosmarinus<br/>officinalis</i> ,<br><i>Pimpinella<br/>anisum</i> , <i>Trixis<br/>californica</i> , and<br><i>Chrysactinia<br/>mexicana</i><br>leaves,<br>ingestion of<br>infusion |

|                                     |      |                      |                    |                                                                          |
|-------------------------------------|------|----------------------|--------------------|--------------------------------------------------------------------------|
| <i>Ruta graveolens</i> L., B.S. 348 | Ruda | Internal hemorrhages | Leaves             | Boiled, together with <i>Punica granatum</i> peel, ingestion of infusion |
|                                     |      | Headache             | Leaves             | Boiled, ingestion of infusion                                            |
|                                     |      | Toothache            | Leaves and flowers | Boiled, ingestion of infusion                                            |
|                                     |      | High pressure        | Leaves             | Boiled, ingestion of infusion                                            |
|                                     |      | Insomnia             | Leaves             | Boiled, ingestion of infusion                                            |
|                                     |      | Nervousness          | Leaves and flowers | Boiled, ingestion of infusion                                            |
|                                     |      | Allergies            | Leaves             | Boiled, take a bath                                                      |
|                                     |      | Hangover             | Leaves             | Boiled, ingestion of infusion                                            |

|                         |                       |                                                          |
|-------------------------|-----------------------|----------------------------------------------------------|
| Ringling in<br>the ears | Leaves                | Boiled, mixed<br>with alcohol,<br>applied in the<br>ears |
| Stomach<br>ache         | Leaves                | Boiled,<br>ingestion of<br>infusion                      |
| Diarrhea                | Leaves                | Boiled,<br>ingestion of<br>infusion                      |
| Abortive                | Leaves and<br>flowers | Boiled,<br>ingestion of<br>infusion                      |
| Colic                   | Leaves                | Boiled,<br>ingestion of<br>infusion                      |
| Rheumatism              | Whole plant           | Boiled, mixed in<br>alcohol, rub the<br>affected part    |
| Ward off<br>witches     | Whole plant           | Place a ruda<br>cross at bedside                         |
| Stomach<br>ache         | Leaves                | Boiled,<br>ingestion of<br>infusion                      |
| Migraine                | Leaves                | Boiled,                                                  |

|  |  |          |        |                                                 |
|--|--|----------|--------|-------------------------------------------------|
|  |  |          |        | ingestion of<br>infusion                        |
|  |  | Deafness | Leaves | Crude, introduce<br>young leaves on<br>the ears |

SALICACEAE

|                                             |       |          |        |                                     |
|---------------------------------------------|-------|----------|--------|-------------------------------------|
| <i>Salix lasiolepis</i> Benth., B.S.<br>355 | Taray | Diabetes | Leaves | Boiled,<br>ingestion of<br>infusion |
|---------------------------------------------|-------|----------|--------|-------------------------------------|

SCROPHULARIACEAE

|                                                                         |        |           |             |                                                                    |
|-------------------------------------------------------------------------|--------|-----------|-------------|--------------------------------------------------------------------|
| <i>Leucophyllum frutescens</i><br>(Berland.) I. M. Johnst., B.S.<br>364 | Cenizo | Hepatitis | Whole plant | Boiled,<br>ingestion of<br>infusion, and<br>take a bath with<br>it |
|-------------------------------------------------------------------------|--------|-----------|-------------|--------------------------------------------------------------------|

|                                                                           |              |         |             |                                |
|---------------------------------------------------------------------------|--------------|---------|-------------|--------------------------------|
| <i>Maurandya antirrhiniflora</i><br>Humb. & Bonpl. ex Willd.,<br>B.S. 373 | Juan y mipil | Measles | Whole plant | Milled, applied<br>on the skin |
|---------------------------------------------------------------------------|--------------|---------|-------------|--------------------------------|

SELAGINELLACEAE

|                                                 |              |                     |        |                                     |
|-------------------------------------------------|--------------|---------------------|--------|-------------------------------------|
| <i>Selaginella pilifera</i> A. Br.,<br>B.S. 349 | Flor de peña | Gastritis           | Leaves | Boiled,<br>ingestion of<br>infusion |
|                                                 |              | Kidney<br>disorders | Leaves | Boiled,<br>ingestion of<br>infusion |

## SIMAROUBACEAE

|                                                                                             |            |                 |        |                                     |
|---------------------------------------------------------------------------------------------|------------|-----------------|--------|-------------------------------------|
| <i>Castela erecta</i> Turp. var.<br><i>texana</i> (Torr. & A. Gray),<br>Cronquist, B.S. 350 | Bisbirinda | Amoeba          | Leaves | Boiled,<br>ingestion of<br>infusion |
|                                                                                             |            | Constipation    | Leaves | Boiled,<br>ingestion of<br>infusion |
|                                                                                             |            | Pancreatitis    | Leaves | Boiled,<br>ingestion of<br>infusion |
|                                                                                             |            | Stomach<br>ache | Leaves | Boiled,<br>ingestion of<br>infusion |

## SOLANACEAE

|                                                                                               |                    |           |                     |                                                                  |
|-----------------------------------------------------------------------------------------------|--------------------|-----------|---------------------|------------------------------------------------------------------|
| <i>Capsicum annuum</i> (Dunal)<br>var. <i>glabriusculum</i> Heiser &<br>Pickersgill, B.S. 356 | Chile de<br>pájaro | Diarrhea  | Leaves and<br>stems | Boiled,<br>ingestion of<br>infusion                              |
| <i>Capsicum annuum</i> L. var.<br><i>annum</i> , B.S. 386                                     | Chile piquín       | Diarrhea  | Leaves and<br>stems | Boiled,<br>ingestion of<br>infusion                              |
| <i>Nicotiana glauca</i> Graham,<br>B.S. 363                                                   | Gigante            | Knee pain | Leaves              | Macerated,<br>toasted, mix<br>with fat, rub the<br>affected part |
| <i>Physalis philadelphica</i>                                                                 | Tomatillo          | Cough     | Calyx               | Boiled,                                                          |

Lam., B.S. 362

ingestion of

infusion

*Solanum tuberosum* L., B.S.

Papa

Gastritis

Root

Liquefied,

357

ingestion crude

Inflamed

Root

Slices, put on

eyes

the eyes

Colitis

Root

Liquefied,

together with

lemon juice, the

first drink of the

day before first

meal, for ten

consecutive days

#### TRAPEOLACEAE

*Tropaeolum majus* L., B.S.

Mastuerzo

Headache

Leaves

Stick over the

361

temple

#### ULMACEAE

*Celtis laevigata* Willd., B.S.

Palo blanco

Diabetes

Bark

Boiled,

387

ingestion of

infusion

Kidney

Bark

Boiled,

disorders

ingestion of

infusion

Grains

Leaves and bark

Boiled, wash the

affected part

|                                       |          |                  |                   |                                                                                |
|---------------------------------------|----------|------------------|-------------------|--------------------------------------------------------------------------------|
| <i>Celtis pallida</i> Torr., B.S. 390 | Granjeno | Ingrown toenails | Leaves and fruits | Milled, mixed with fat, applying the affected part, and covered with a bandage |
|---------------------------------------|----------|------------------|-------------------|--------------------------------------------------------------------------------|

VERBENACEAE

|                                                   |           |                  |             |                                                                                |
|---------------------------------------------------|-----------|------------------|-------------|--------------------------------------------------------------------------------|
| <i>Aloysia triphylla</i> Britton, B.S. 360        | Cedrón    | Stomach ache     | Leaves      | Boiled, together with <i>Matricaria recutita</i> leaves, ingestion of infusion |
|                                                   |           | Menstrual cramps | Leaves      | Boiled, ingestion of infusion                                                  |
|                                                   |           | High pressure    | Leaves      | Boiled, ingestion of infusion                                                  |
| <i>Glandularia bipinnatifida</i> Nutt., B.S. 359. | Moradilla | The evil eye     | Whole plant | Milled, into cold water, rub the whole body with the solution                  |
| <i>Lippia graveolens</i> Kunth., B.S. 388         | Pionia    | Headache         | Leaves      | Boiled, ingestion of infusion                                                  |

VITACEAE

|                                                       |               |          |       |                                                                               |
|-------------------------------------------------------|---------------|----------|-------|-------------------------------------------------------------------------------|
| <i>Vitis cinerea</i> (Engelm.)<br>Millardet, B.S. 358 | Uva silvestre | Backache | Stems | Boiled,<br>ingestion of<br>infusion, and rub<br>the back with<br>the solution |
|-------------------------------------------------------|---------------|----------|-------|-------------------------------------------------------------------------------|

ZYGOPHYLLACEAE

|                                               |             |                     |                     |                                                                                                                                                                     |
|-----------------------------------------------|-------------|---------------------|---------------------|---------------------------------------------------------------------------------------------------------------------------------------------------------------------|
| <i>Larrea tridentata</i> Coville,<br>B.S. 389 | Gobernadora | Stomach<br>ache     | Stems               | Boiled (for 10<br>seconds, it is<br>very strong<br>plant), ingestion<br>of infusion or<br>chew the<br>meristems for<br>few seconds (not<br>swallow) and<br>spit out |
|                                               |             | Diarrhea            | Leaves              | Boiled,<br>ingestion of<br>infusion                                                                                                                                 |
|                                               |             | Kidney<br>disorders | Leaves and<br>stems | Boiled,<br>ingestion of<br>infusion                                                                                                                                 |
|                                               |             | Foot pain           | Leaves and<br>stems | Boiled, rub the<br>affected part                                                                                                                                    |

|               |             |                                                                                                                        |
|---------------|-------------|------------------------------------------------------------------------------------------------------------------------|
|               |             | with the solution                                                                                                      |
| Constipation  | Stems       | Boiled (for 10 seconds, it is very strong plant), together with <i>Flourensia cernua</i> leaves, ingestion of infusion |
| Foot fungus   | Whole plant | Boiled, rub the foot with the solution for 30 minutes                                                                  |
| Kidney stones | Whole plant | Boiled (for 10 seconds, it is very strong plant), ingestion of infusion                                                |
| Gastritis     | Leaves      | Place the leaves in water for one night, ingestion of infusion                                                         |
| Smelly feet   | Leaves      | Put a bunch of leaves into shoes or boil them,                                                                         |

Fright

Whole plant

together with

salt and wash

the feet

Pass it over the

body
